# Supplementary material
Source: publisher figshare collection journal article supplement (https://acs.figshare.com/ndownloader/files/6886902)
Supplement: Supplementary file 1 [file 6886902]

## One pot conversion of fluorophores to phosphorophores.

Matan Soll<sup>a‡</sup>, Kolanu Sudhakar<sup>a‡</sup>, Natalia Fridman<sup>a</sup>, Alexander Müller<sup>b</sup>, Beate Röder<sup>b</sup> and Zeev Gross<sup>a‡\*</sup>

<sup>a</sup> *Schulich Faculty of Chemistry, Technion – Israel Institute of Technology, Haifa 32,000, Israel*

<sup>b</sup> *AG Photobiophysik, Humboldt-Universität zu Berlin MNF, Newtonstrass 1512489 Berlin, Germany*

| 1.0      | Table of Contents                                                                                                                                                                           | Page No.<br>S1-S2 |
|----------|---------------------------------------------------------------------------------------------------------------------------------------------------------------------------------------------|-------------------|
| 2.0      | Experimental Section                                                                                                                                                                        | S2                |
| 2.1      | Methods and Materials                                                                                                                                                                       | S2-S3             |
| 2.2      | Synthesis                                                                                                                                                                                   | S3-S5             |
| 2.3      | References                                                                                                                                                                                  | S5-S6             |
| 2.4      | Spectra                                                                                                                                                                                     | S6-S18            |
| Fig. S1  | <sup>1</sup> H NMR spectrum of non-aromatic product from the reaction between <b>(H<sub>3</sub>)tpfc</b> and NIS in Methanol as solvent and recorded spectrum in CDCl <sub>3</sub> solvent. | S6                |
| Fig. S2  | <sup>1</sup> H NMR of <b>(H<sub>3</sub>)(I<sub>4</sub>-tpfc)</b>                                                                                                                            | S7                |
| Fig. S3  | <sup>19</sup> F NMR of <b>(H<sub>3</sub>)(I<sub>4</sub>-tpfc)</b>                                                                                                                           | S7                |
| Fig. S4  | High resolution APCI mass spectrum of <b>(H<sub>3</sub>)(I<sub>4</sub>-tpfc)</b>                                                                                                            | S8                |
| Fig. S5  | <sup>1</sup> H NMR of <b>(I<sub>4</sub>-tpfc)Cu</b>                                                                                                                                         | S8                |
| Fig. S6  | <sup>19</sup> F NMR of <b>(I<sub>4</sub>-tpfc)Cu</b>                                                                                                                                        | S9                |
| Fig. S7  | High resolution APCI mass spectrum of <b>(I<sub>4</sub>-tpfc)Cu</b>                                                                                                                         | S9                |
| Fig. S8  | <sup>1</sup> H NMR of <b>(I<sub>4</sub>-tpfc)Ag</b>                                                                                                                                         | S10               |
| Fig. S9  | <sup>19</sup> F NMR of <b>(I<sub>4</sub>-tpfc)Ag</b>                                                                                                                                        | S10               |
| Fig. S10 | High-resolution APCI Mass spectrum of <b>(I<sub>4</sub>-tpfc)Ag</b> .                                                                                                                       | S11               |
| Fig. S11 | <sup>1</sup> H NMR of <b>(tpfc)Au</b>                                                                                                                                                       | S12               |
| Fig. S12 | <sup>19</sup> F NMR of <b>(tpfc)Au</b>                                                                                                                                                      | S12               |
| Fig. S13 | High-resolution APCI mass spectrum of <b>(tpfc)Au</b> .                                                                                                                                     | S13               |
| Fig. S14 | <sup>1</sup> H NMR of <b>(I<sub>4</sub>-tpfc)Au</b>                                                                                                                                         | S14               |
| Fig. S15 | <sup>19</sup> F NMR of <b>(I<sub>4</sub>-tpfc)Au</b>                                                                                                                                        | S14               |
| Fig. S16 | High-resolution APCI mass spectrum of <b>(I<sub>4</sub>-tpfc)Au</b> .                                                                                                                       | S15               |
| Fig. S17 | <sup>1</sup> H NMR of <b>(I<sub>3</sub>-tpfc)Ag</b> (contaminated by unreacted <b>(tpfc)Ag</b> )                                                                                            | S16               |
| Fig. S18 | <sup>19</sup> F NMR of <b>(I<sub>3</sub>-tpfc)Ag</b> (contaminated with unreacted <b>(tpfc)Ag</b> )                                                                                         | S16               |
| Fig. S19 | APCI mass spectrum of <b>(I<sub>3</sub>-tpfc)Ag</b> (contaminated with unreacted                                                                                                            | S17               |

(tpfc)Ag)

|          |                                                                                                                                                                                                                                                              |     |
|----------|--------------------------------------------------------------------------------------------------------------------------------------------------------------------------------------------------------------------------------------------------------------|-----|
| Fig. S20 | <sup>1</sup> H NMR spectrum of ( <b>I<sub>3</sub>-tpfc</b> )Au (contaminated with unreacted ( <b>tpfc</b> )Au).                                                                                                                                              | S18 |
| Fig. S21 | <sup>19</sup> F NMR spectrum of ( <b>I<sub>3</sub>-tpfc</b> )Au (contaminated with unreacted ( <b>tpfc</b> )Au).                                                                                                                                             | S18 |
| Fig. S22 | Absorption spectra, in toluene at RT, of (H <sub>3</sub> )tpfc, (tpfc)Cu, (tpfc)Ag, (tpfc)Au, (H <sub>3</sub> )(I <sub>4</sub> -tpfc), (I <sub>4</sub> -tpfc)Cu, (I <sub>4</sub> -tpfc)Ag, and (I <sub>4</sub> -tpfc)Au                                      | S19 |
| Fig. S23 | Emission spectra, in toluene at RT and with λ <sub>ex</sub> = 405 nm, of (H <sub>3</sub> )tpfc, (tpfc)Cu, (tpfc)Ag, (H <sub>3</sub> )(I <sub>4</sub> -tpfc), (I <sub>4</sub> -tpfc)Cu, (I <sub>4</sub> -tpfc)Ag, (I <sub>4</sub> -tpfc)Au.                   | S19 |
| Fig. S24 | (a) Full emission spectra of (H <sub>2</sub> )tpp, (H <sub>3</sub> )tpfc, upon excitation at 405 nm of toluene solutions with identical optical density. (b) Emission spectra of the (tpfc)M and (I <sub>4</sub> -tpfc)M complexes, with M = Cu, Ag, and Au. | S20 |
| Fig. S25 | Crystal structures of (tpfc)Au.                                                                                                                                                                                                                              | S21 |
| Table S1 | X-ray crystallography data of (tpfc)Au, (I <sub>4</sub> -tpfc)Cu, (I <sub>4</sub> -tpfc)Ag, (I <sub>4</sub> -tpfc)Au.                                                                                                                                        | S21 |
| Table S2 | Absorption data of all the compounds.                                                                                                                                                                                                                        | S22 |

## 2. Experimental

### 2.1 Methods and Materials.

Commercially available reagents and chemicals were procured from sigma-Aldrich. Analytical reagent (AR) grade solvents were used for the reactions while spectroscopic grade solvents were used for photophysical properties and ASTM silica gel (230-400 mesh) and Sigma-Aldrich (Fluka) Aluminum oxide neutral were used for column chromatography. Thin-layer chromatography was performed on Merck-precoated silica gel 60-F<sub>254</sub> plates. Either gravity or flash chromatography was performed for purification of all compounds. All the reactions were carried out under aerobic conditions while the spectroscopic sample prepared under nitrogen atmosphere.

**2.1.1 Physical Methods.** <sup>1</sup>H and <sup>19</sup>F NMR spectra were recorded Bruker Avance III 400 spectrometer equipped with a 5 mm, automated tuning, and matching broad band probe (BBFO) with z-gradients, operating at 400.4 MHz for <sup>1</sup>H and 376.7 MHz for F, respectively. Chemical shifts are reported in ppm relative to the residual hydrogen atoms in the deuterated solvent CDCl<sub>3</sub> (δ = 7.26). High-resolution mass spectra for the non-iodinated compounds were performed on a Bruker Maxis Impact mass spectrometer, using APCI (atmospheric pressure chemical ionization) direct probe in either positive or negative mode. High-resolution mass spectra for the iodinated compound was performed on a Waters LCT Premier mass spectrometer, using TOF electron spray positive mode in CH<sub>3</sub>CN/water 70:30, flow 0.25.

**2.1.2 Crystal Structure Determination.** The single-crystal material was immersed in Paratone–N oil and was quickly fished with a glass rod and mounted on a Kappa CCD diffractometer under a cold stream of nitrogen. Data collection was performed using monochromated Mo K $\alpha$  radiation,  $\lambda = 0.71073$  Å, using  $\phi$  and  $\omega$  scans to cover the Ewald sphere.<sup>1</sup> Accurate cell parameters were obtained with the amount of indicated reflections.<sup>2</sup> The structure was solved by direct methods (SHELXS-97)<sup>3</sup> and refined by full-matrix least-squares methods against  $F^2$  (SHELXL-97).<sup>4</sup> All non-hydrogen atoms were refined with anisotropic displacement parameters. The hydrogen atoms were refined isotopically on calculated positions using a riding model with their  $U_{\text{iso}}$  values constrained to 1.5 times the  $U_{\text{eq}}$  of their pivot atoms for terminal sp<sup>3</sup> carbon atoms and 1.2 times for all other carbon atoms. Software used for molecular graphics: Mercury 3.5.<sup>5</sup>

**2.1.3 Spectroscopy.** Absorption spectra of the samples were measured on an HP 8453 diode array spectrophotometer in toluene. Steady-state fluorescence spectra of the investigated compounds were measured in 1 cm  $\times$  1 cm quartz optical cells using a combination of a CW xenon lamp (XBO 150) and a monochromator (Lot-Oriel, bandwidth 10 nm) for excitation and a polychromator with a cooled CCD matrix as a detector system (Lot-Oriel, Instaspec IV).<sup>6</sup> Fluorescence lifetimes were measured by the time-correlated single photon counting (TCSPC) technique, using the frequency-doubled pulses of a Ti:sapphire laser (Coherent Mira 900, 405 nm, fwhm 200 fs) for excitation. The instrument response function was 33 ps, as measured at excitation wavelength with Ludox.<sup>7</sup> A self-made routine was applied to minimize the least-squares error between the model function convoluted with instrument response function and the measured data set. Triplet lifetimes were determined for each corrole in air-saturated and nitrogen-flushed Toluene solution. The optical densities of the samples were adjusted to OD = 0.200 at 405 nm for the steady state measurements and to OD = 0.200 at the excitation wavelength for flash photolysis measurements. The singlet oxygen measurements in toluene were performed using samples with an OD = 0.200 at 405 nm.

**2.2 Synthesis** 5,10,15-tris(pentafluorophenyl)corrole (H<sub>3</sub>)tpfc,<sup>8-10</sup> Cu(III)-5,10,15-tris(pentafluorophenyl)corrole (tpfc)Cu,<sup>11,12</sup> Ag(III)-5,10,15-tris(pentafluorophenyl)corrole<sup>13</sup> were synthesized according to the literature procedures.

**2.2.2 Gold(III)-5,10,15-tris(pentafluorophenyl)corrole (tpfc)Au:** 5,10,15-tris(pentafluorophenyl)corrole (0.1 g, 0.12 mmol) was added to a solution of gold acetate (0.9 g, 0.24 mmol) in pyridine (10 mL) stirred at room temperature under N<sub>2</sub> atmosphere. TLC analysis show complete consumption of starting material after 1 h and the solvent was evaporated under reduced pressure without heating. The product was purified on Alumina column chromatography with CH<sub>2</sub>Cl<sub>2</sub>-hexane 4:1 v/v furnished the desired product (0.014 g) as a purple solid in 12% yield. <sup>1</sup>H NMR (601 MHz, CDCl<sub>3</sub>)  $\delta$ , ppm 9.26 (d,  $J = 4.5$  Hz, 2H), 8.96 (d,  $J = 4.8$  Hz, 2H), 8.80 (d,  $J = 4.3$  Hz, 4H). <sup>19</sup>F NMR (377 MHz, CDCl<sub>3</sub>)  $\delta$ , ppm -136.95 (dt,  $J = 22.3$  Hz), -150, -151.97-161.29. HRMS (APCI-

TOF)  $m/z$ :  $[M]^+$  Calcd. for  $C_{37}H_8AuF_{15}N_4$ : 990.0170; Found 990.0151. UV/Vis (Toluene)  $\lambda_{max}$  nm ( $\epsilon \times 10^4$ ): 400 (4.32), 421 (16.72), 493 (0.59), 530 (0.95), 564 (3.98),

**2.2.3 2,3,17,18-tetraiodo-5,10,15-tris(pentafluorophenyl)corrole ( $H_3$ )( $I_4$ -tpfc):** 5,10,15-tris(pentafluorophenyl)corrole (0.1 g, 0.12 mmol) and N-iodosuccinamide (0.14 g, 0.63 mmol) in dry Pyridine (10 ml) was added to a stirred mixture in the aerobic condition at room temperature for 1 h. TLC analysis show complete consumption of starting material and remove the solvent by vacuum. Reaction mixture was washed with sodium thiosulfate solution to quench the excess of iodine, collected in  $CH_2Cl_2$  and dried with anhydrous  $Na_2SO_4$ . Purification of the residue by column chromatography on silica gel ( $CH_2Cl_2$ –hexane, 1:4, v/v) furnished the product (0.62 g) as a purple solid in 40% yield.  $^1H$  NMR (200 MHz,  $CDCl_3$ )  $\delta$ , ppm 8.47 (d,  $J = 4.8$  Hz, 2H), 8.22 (d,  $J = 4.9$  Hz, 2H).  $^{19}F$  NMR (377 MHz,  $CDCl_3$ )  $\delta$ , ppm -137.15 – -137.27 (m, 2F), -137.53 (d,  $J = 16.4$  Hz, 4F), -151.32 (t, 2F), -151.50 (t,  $J = 21.0$  Hz, 1F), -160.96 (dd,  $J = 21.5, 15.4$  Hz, 2F), -161.57 (t,  $J = 18.3$  Hz, 4F). HRMS (APCI-TOF)  $m/z$ :  $[M]^+$  Calcd for  $C_{37}H_7F_{15}I_4N_4$ : 1299.6609; Found 1298.6747. UV/Vis (Toluene)  $\lambda_{max}$  nm ( $\epsilon \times 10^4$ ): 421 (11.84), 443 (12.40), 594 (4.40), 618 (4.06), 665 (1.70).

**2.2.4 General procedure for one-pot synthesis of the tetraiodinated metallocorroles, ( $I_4$ -tpfc)M:** 5,10,15-tris(pentafluorophenyl)corrole (100 mg, 1 eq.) and N-iodosuccinamide (280 mg, 10 eq.) and metal acetate (2 to 10 eq.) in dry pyridine (10 mL) were stirred under aerobic condition at room temperature until full consumption of the starting material was indicated by TLC (1 to 6 h), after which the pyridine was evaporated. The solids were dissolved in  $CH_2Cl_2$ , washed with aqueous sodium thiosulfate, and the organic phase was dried by anhydrous  $Na_2SO_4$  and evaporated. **(a) Copper(III)-2,3,17,18-tetraiodo-5,10,15-tris(pentafluorophenyl)corrole ( $I_4$ -tpfc)Cu:** Purification by column chromatography on neutral alumina ( $CH_2Cl_2$ –hexane, 1:6, v/v) furnished the product (0.129 g, 76% yield.) as a purple colored solid.  $^1H$  NMR (300 MHz,  $CDCl_3$ )  $\delta$ , ppm 6.96 (dd,  $J = 11.5, 4.5$  Hz, 2H).  $^1H$  NMR (600 MHz,  $CDCl_3$ )  $\delta$ , ppm 6.97 (d,  $J = 3.7$  Hz, 2H), 6.93 (d,  $J = 3.9$  Hz, 2H).  $^{19}F$  NMR (377 MHz,  $CDCl_3$ )  $\delta$ , ppm -137.06 – -137.40 (m, 6F), -150.53 (t,  $J = 20.9$  Hz, 1F), -150.72 (t,  $J = 21.0$  Hz, 2F), -159.60 – -159.78 (m, 2F), -160.61 (td,  $J = 21.8, 6.6$  Hz, 4F). HRMS (APCI-TOF)  $m/z$ :  $[M]^+$  Calcd for  $C_{37}H_4N_4F_{15}I_4Cu$  1359.5671; Found 1358.5325. UV/Vis (toluene)  $\lambda_{max}$  nm ( $\epsilon \times 10^4$ ): 418 (15.61), 573 (2.61), 714 (0.21). **(b) Silver(III)-2,3,17,18-tetraiodo-5,10,15-tris(pentafluorophenyl)-corrole ( $I_4$ -tpfc)Ag:** Purification by column chromatography on neutral aluminium oxide ( $CH_2Cl_2$ –hexane, 1:4, v/v) furnished the product (0.079 g, 45% yield) as a dark red colored solid.  $^1H$  NMR (400 MHz,  $CDCl_3$ )  $\delta$ , ppm 8.70 (d,  $J = 4.9$  Hz, 2H), 8.62 (d,  $J = 4.8$  Hz, 2H).  $^{19}F$  NMR (377 MHz,  $CDCl_3$ )  $\delta$ , ppm -136.81 – -137.02 (m, 6F), -150.90 (t,  $J = 20.9$  Hz, 1F), -151.20 (t,  $J = 21.0$  Hz, 2F), -160.65 (dt,  $J = 22.2, 7.0$  Hz, 2F), -161.70 (dt,  $J = 22.9, 7.4$  Hz, 4F). HRMS (APCI-TOF)  $m/z$ :  $[M]^+$  Calcd for  $C_{37}H_4N_4F_{15}I_4Ag$  1403.5421; Found 1403.5099. UV/Vis (Toluene)  $\lambda_{max}$  nm ( $\epsilon \times 10^4$ ): 434 (21.32), 542 (1.90), 585 (11.56), 648 (0.18). **(c) Gold(III)-**

**2,3,17,18-tetraiodo-5,10,15-tris(pentafluorophenyl)corrole ( $I_4$ -tpfc)Au:** Purification by column chromatography on neutral alumina ( $CH_2Cl_2$ –hexane, 2:9, v/v) furnished the product (0.099 g, 53% yield) as a red colored solid.  $^1H$  NMR (200 MHz,  $CDCl_3$ )  $\delta$ , ppm 8.81 (d,  $J$  = 5.0 Hz, 2H), 8.72 (d,  $J$  = 5.0 Hz, 2H).  $^{19}F$  NMR (377 MHz,  $CDCl_3$ )  $\delta$ , ppm -136.69 (dd,  $J$  = 24.2, 7.8 Hz, 4F), -136.87 (dd,  $J$  = 22.9, 7.1 Hz, 2F), -150.95 (t,  $J$  = 20.9 Hz, 1F), -151.37 (t,  $J$  = 21.0 Hz, 2F), -160.71 (dt,  $J$  = 22.4, 11.3 Hz, 2F), -161.84 (td,  $J$  = 22.9, 7.4 Hz, 4F). HRMS (APCI-TOF)  $m/z$ :  $[M]^+$  Calcd for  $C_{37}H_4N_4F_{15}I_4Au$  1493.6041; Found 1493.6041. UV/Vis (Toluene)  $\lambda_{max}$  nm ( $\epsilon \times 10^4$ ): 427 (17.20), 505 (0.61), 542 (1.59), 583 (10.04).

**2.2.5 Silver(III)- 2,17,18-triiodo-5,10,15-tris(pentafluorophenyl)corrole ( $I_3$ -tpfc)Ag:** Silver(III)-5,10,15-tris(pentafluorophenyl)corrole (tpfc)Ag (0.05 g, 0.055 mmol) and N-iodosuccinamide (0.123 g, 0.55 mmol) in dry pyridine (10 ml) was refluxed for 12 h under nitrogen. TLC analysis and absorption spectra were show inseparable mixture of product and reactant. Purification by flash column chromatography on neutral aluminum oxide ( $CH_2Cl_2$ –hexane, 2:9, v/v) furnished the product (0.039 g) as a red colored solid in 55% yield.  $^1H$  NMR (400 MHz,  $CDCl_3$ )  $\delta$ , ppm 8.74 (d, 2H), 8.80 (d, 2H), 9.54 (1H, s).  $^{19}F$  NMR (377 MHz,  $CDCl_3$ )  $\delta$ , ppm -136.50 (m), -151.45 (m), -161.37 (m), -162.03 (m). APCI-MS  $m/z$ : 1279.601  $[M]^+$ . UV/Vis (Toluene)  $\lambda_{max}$  nm: 427 (17.20), 533 (1.59), 576 (10.04).

**2.2.6 Gold(III)- 2,17,18-triiodo-5,10,15-tris(pentafluorophenyl)corrole ( $I_3$ -tpfc)Au:** Gold(III)-5,10,15-tris(pentafluorophenyl)corrole (tpfc)Au (0.02 g, 0.02 mmol) and N-iodosuccinamide (0.045 g, 0.2 mmol) in dry pyridine (8 ml) was refluxed for 24 h under nitrogen. TLC analysis show inseparable mixture of product and reactant. Purification by flash column chromatography on neutral aluminum oxide ( $CH_2Cl_2$ –hexane, 2:8, v/v) furnished the mixture of ( $I_3$ -tpfc)Au (52%) and unreacted starting material (30%) collected. Analyzed mixture product by  $^1H$  NMR (400 MHz,  $CDCl_3$ )  $\delta$ , ppm 8.73 to 8.79 (m, 2H), 8.84 (d, 2H), 9.54 (1H, s).  $^{19}F$  NMR (377 MHz,  $CDCl_3$ )  $\delta$ , ppm -137.04 (m), -151.45 to -153.45 (m), -161.67 (m), -162.98 (m).

## 2.3 References:

1. Nonius, B. V. Kappa CCD Software. Nonius BV, Delft, The Netherlands, 1999.
2. Otwinowski, Z.; Minor, W. Otwinowski, W., Eds.; Academic Press: New York, 1996; p 276.
3. Sheldrick, G. M. *Acta Cryst., Sect. A: Fund. Cryst.* **1990**, *46*, 467-473.
4. ORTEP, TEXSAN *Structure Analysis Package*, Molecular Structure Corp., The Woodlands, TX, 1999.
5. Mercury Software CCDC: <http://www.ccdc.cam.ac.uk/Solutions/CSDSystem/Pages/Mercury>.
6. Korth, O.; Hanke, T.; Rückmann, I.; Röder, B. *Exp. Tech. Phys.* **1995**, *41*, 25–36.

- Makarov, S.; Litwinski, C.; Ermilov, E. A.; Suvorova, O.; Röder, B.; Wöhrle, D. *Chem. Eur. J.* **2006**, *12*, 1468–1474.
- Gross, Z.; Galili, N.; Botoshansky, M.; Simkhovich, L.; Blalser, D.; Boese, R.; Saltsman, I.; Goldberg, I. *Organic Lett.*, **1999**, *1*, 599-602.
- Gryko, D.T.; Koszarna, B. *Org. Biomol. Chem.*, **2003**, *1*, 350–357.
- Blumenfeld, C.; Fisher, K.J.; Henling, L.M.; Grubbs, R.H.; Gray, H.B.; Virgil, S.C. *Eur. J. Org. Chem.* **2015**, 3022–3025.
- Wasbotten, I. H.; Wondimagegn, T.; Ghosh, A. *J. Am. Chem. Soc.* **2002**, *124*, 8104-8116.
- Luobeznova, I.; Simkhovich, L.; Goldberg, I.; Gross, Z. *Eur. J. Inorg. Chem.* **2004**, 1724-1732
- Stefanelli, M.; Shen, J.; Zhu, W.; Mastroianni, M.; Mandoj, F.; Nardis, S.; Ou, Z.; Kadish, K. M.; Fronczek, F. R.; Smith, K. M.; Paolesse, R. *Inorg. Chem.* **2009**, *48*, 6879-6887.

## 2.4. Spectra

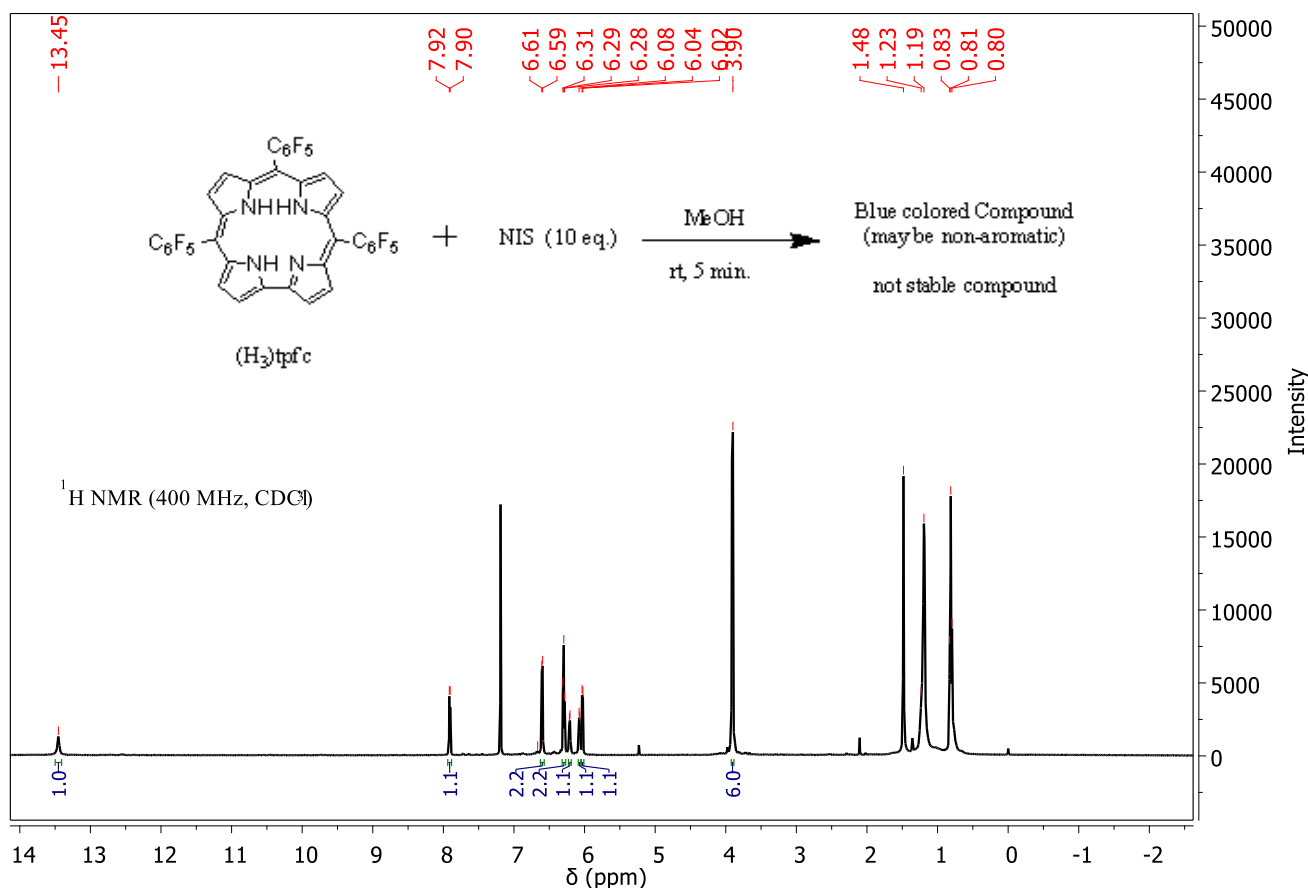

**Fig. S1:**  $^1H$  NMR spectrum of non-aromatic product from the reaction between  $(H_3)tpfc$  and NIS in Methanol as solvent and recorded spectrum in  $CDCl_3$  solvent.

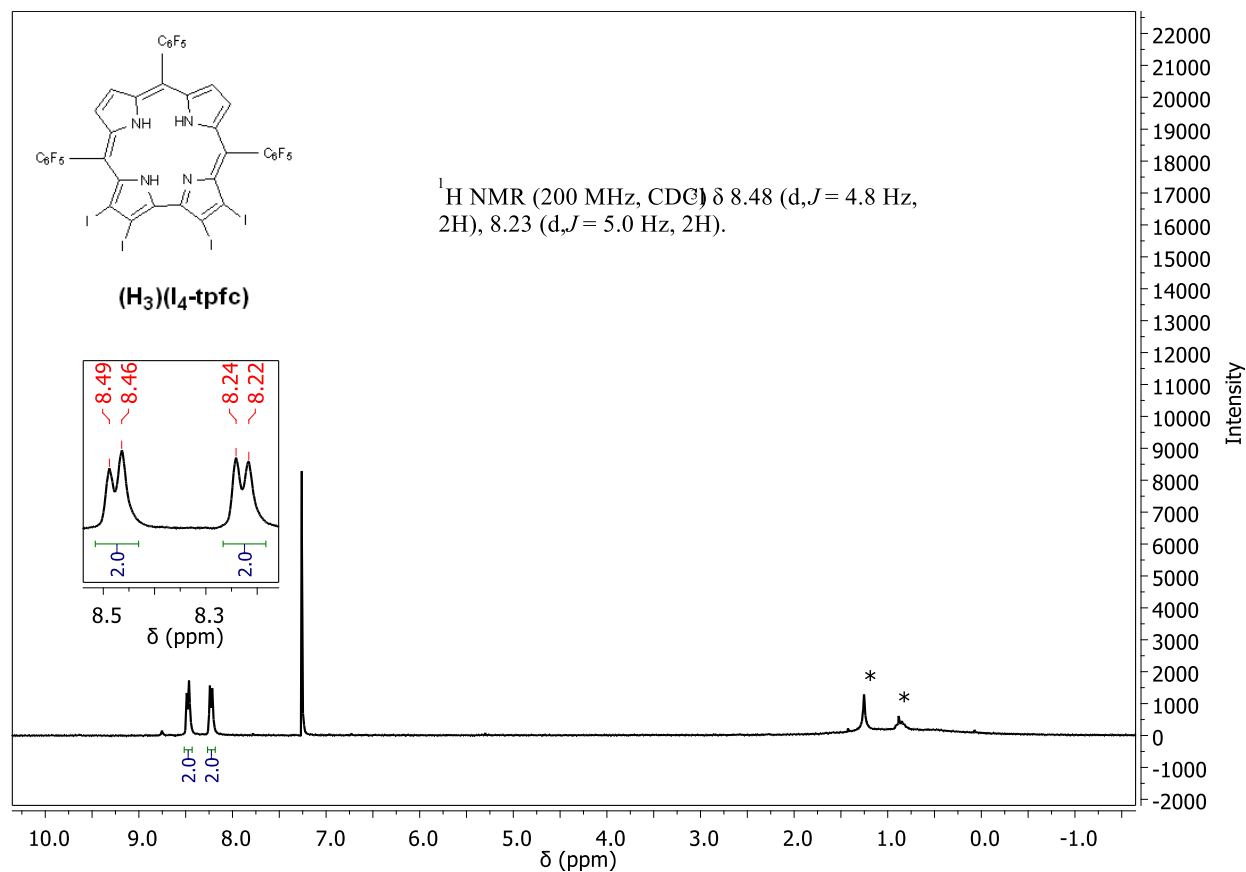

**Fig. S2:** <sup>1</sup>H NMR spectrum of **(H<sub>3</sub>)(I<sub>4</sub>-tpfc)** were recorded at 400 MHz in CDCl<sub>3</sub> solvent. ‘\*’ indicates solvents impurities.

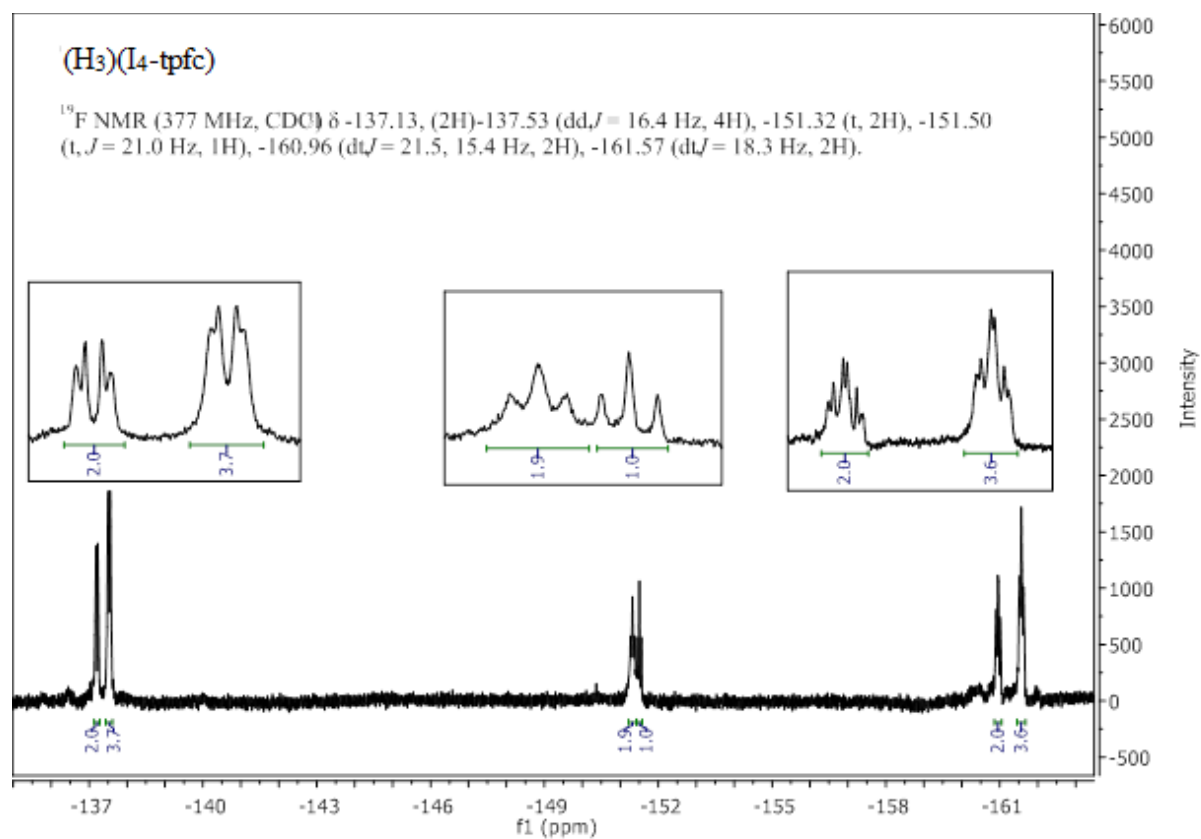

**Fig. S3:** <sup>19</sup>F NMR spectrum of **(H<sub>3</sub>)(I<sub>4</sub>-tpfc)** were recorded at 377 MHz in CDCl<sub>3</sub> solvent.

## Single Mass Analysis

Tolerance = 20.0 mDa / DBE: min = -1.5, max = 50.0

Element prediction: On (Carbon range  $\pm 5$ ) (Set 0 < Cl < 9, 0 < Br < 9 and 0 < S < 7 for enhanced filtering)

Number of isotope peaks used for i-FIT = 3

Monoisotopic Mass, Odd and Even Electron Ions

855 formula(e) evaluated with 19 results within limits (up to 2 closest results for each mass)

Elements Used:

C: 30-40 H: 0-10 N: 0-5 F: 10-20 I: 0-4 Ir: 0-2

22-Feb-2016

Gr\_2879n 66 (0.524) Cm (57.72)

(H<sub>3</sub>)(I<sub>4</sub>-tpfc)TOF MS ES-  
4.72e+003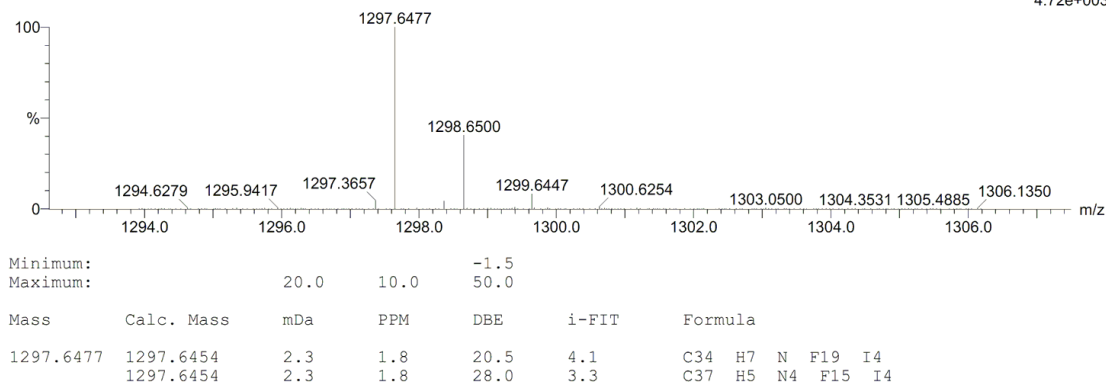

**Fig. S4:** High resolution APCI mass spectrum of (H<sub>3</sub>)(I<sub>4</sub>-tpfc) with calculated mass 1297.6454

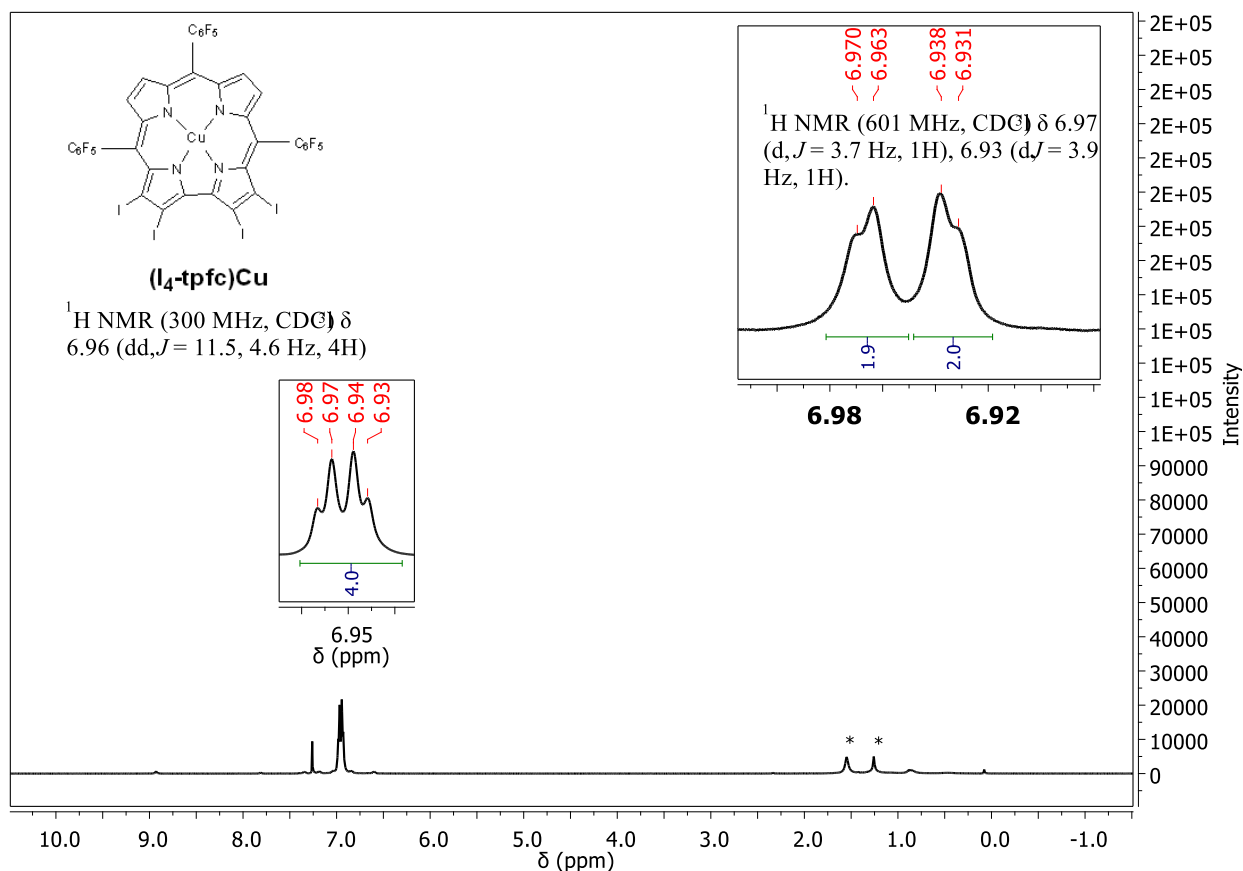

**Fig. S5:** <sup>1</sup>H NMR spectrum of (I<sub>4</sub>-tpfc)Cu were recorded at 400 MHz in CDCl<sub>3</sub> solvent and “\*” Indicates solvent impurities. Inset spectrum clarify two different doublets recorded at 601 MHz.



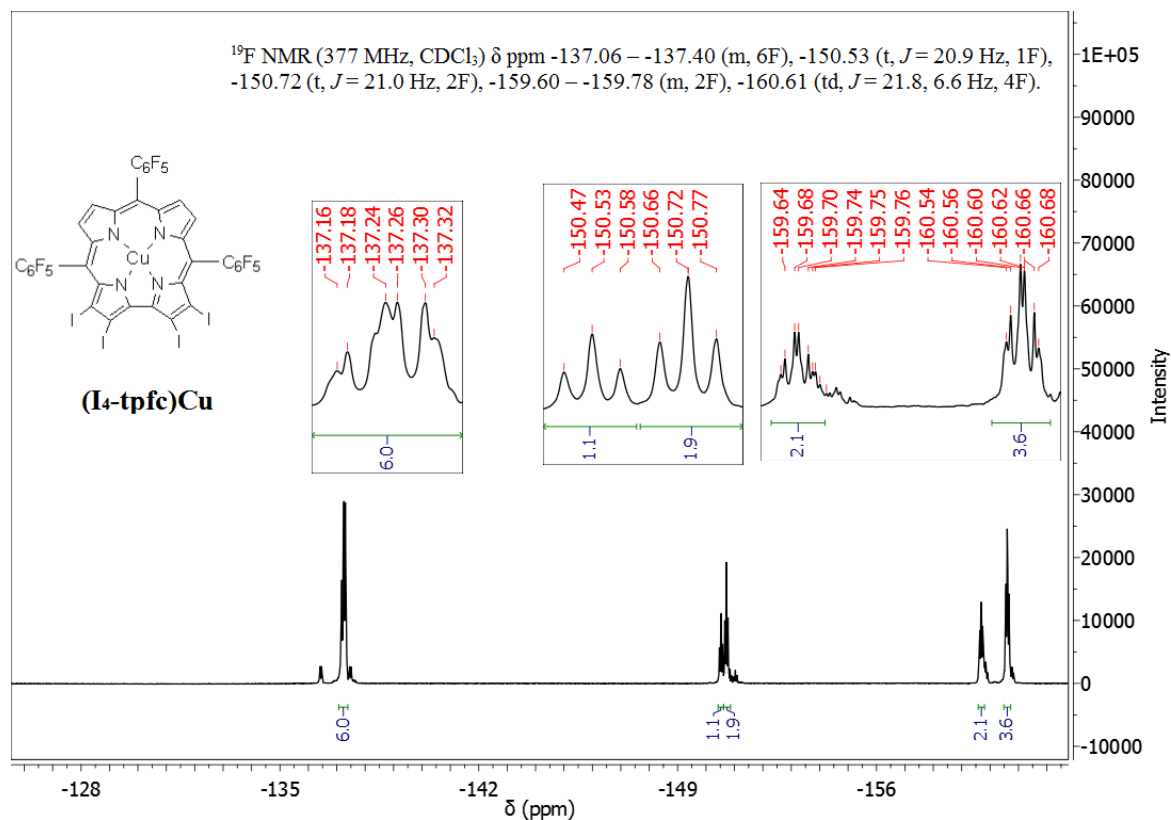

**Fig. S6:** <sup>19</sup>F NMR spectrum of **(I<sub>4</sub>-tpfc)Cu** were recorded at 377 MHz in CDCl<sub>3</sub> solvent.

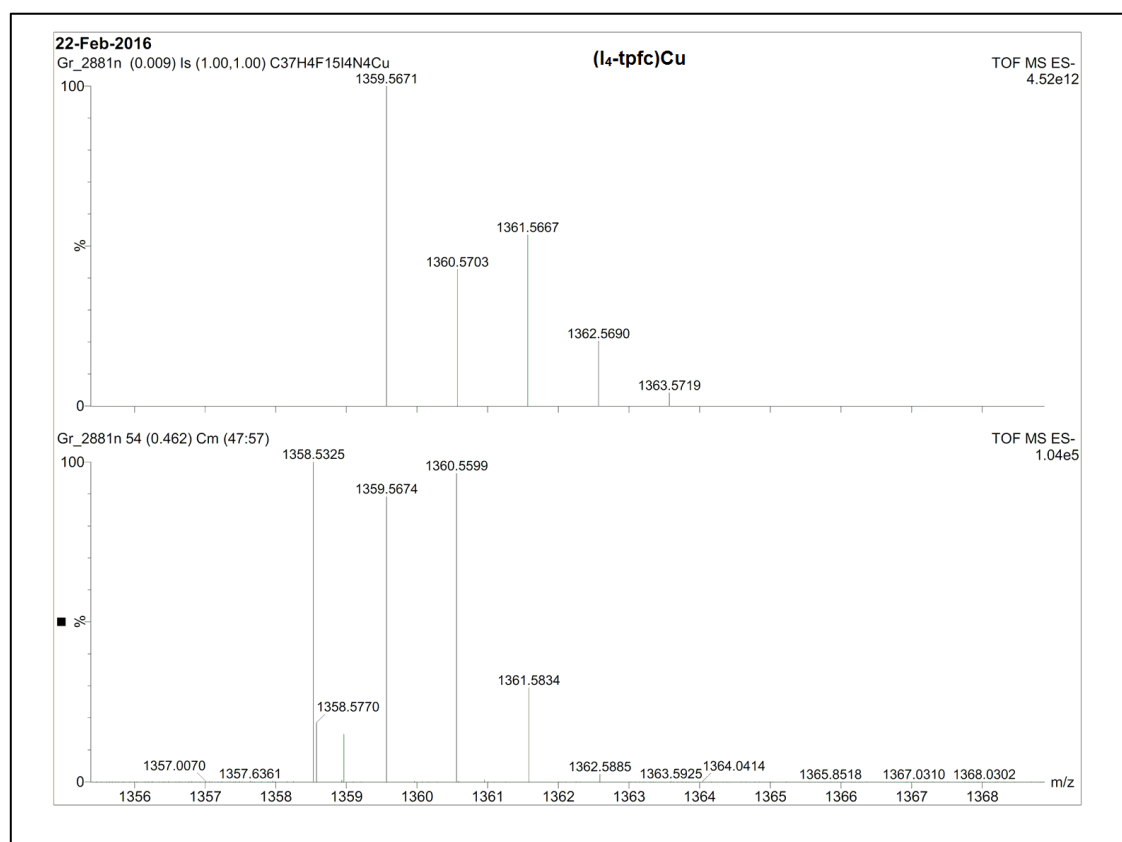

**Fig. S7:** High resolution APCI mass spectrum of **(I<sub>4</sub>-tpfc)Cu** with calculated mass 1359.5671.

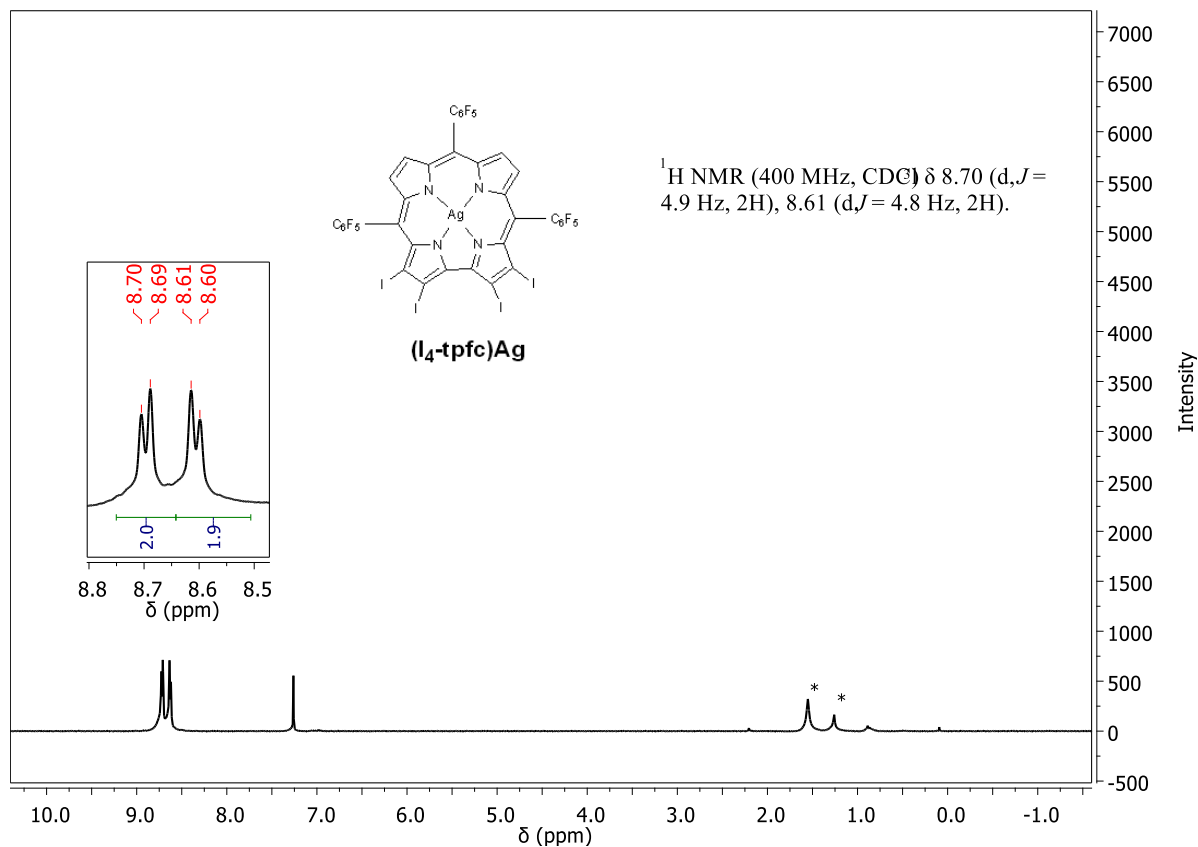

**Fig. S8:** <sup>1</sup>H NMR spectrum of **(I<sub>4</sub>-tpfc)Ag** were recorded at 400 MHz in CDCl<sub>3</sub> solvent and ‘\*’ indicates solvents impurities.

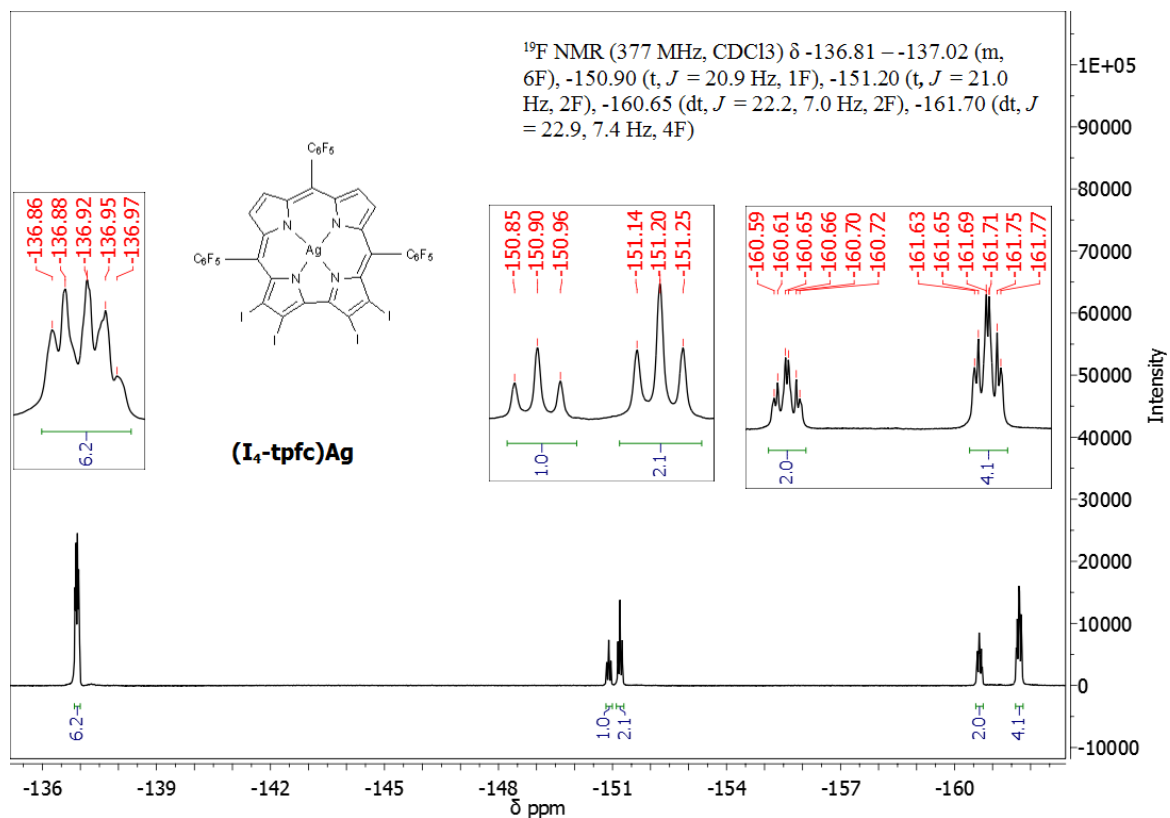

**Fig. S9:** <sup>19</sup>F NMR spectrum of **(I<sub>4</sub>-tpfc)Ag** were recorded at 377 MHz in CDCl<sub>3</sub> solvent.

## Generic Display Report

### Analysis Info

Analysis Name D:\Data\Gross\Gr\_3043n000001.d  
Method APCI\_neg\_SolidProbe.m  
Sample Name Ag-TPFC-4i  
Comment

Acquisition Date 3/29/2016 2:20:42 PM

Operator Larisa Panz  
Instrument maXis impact

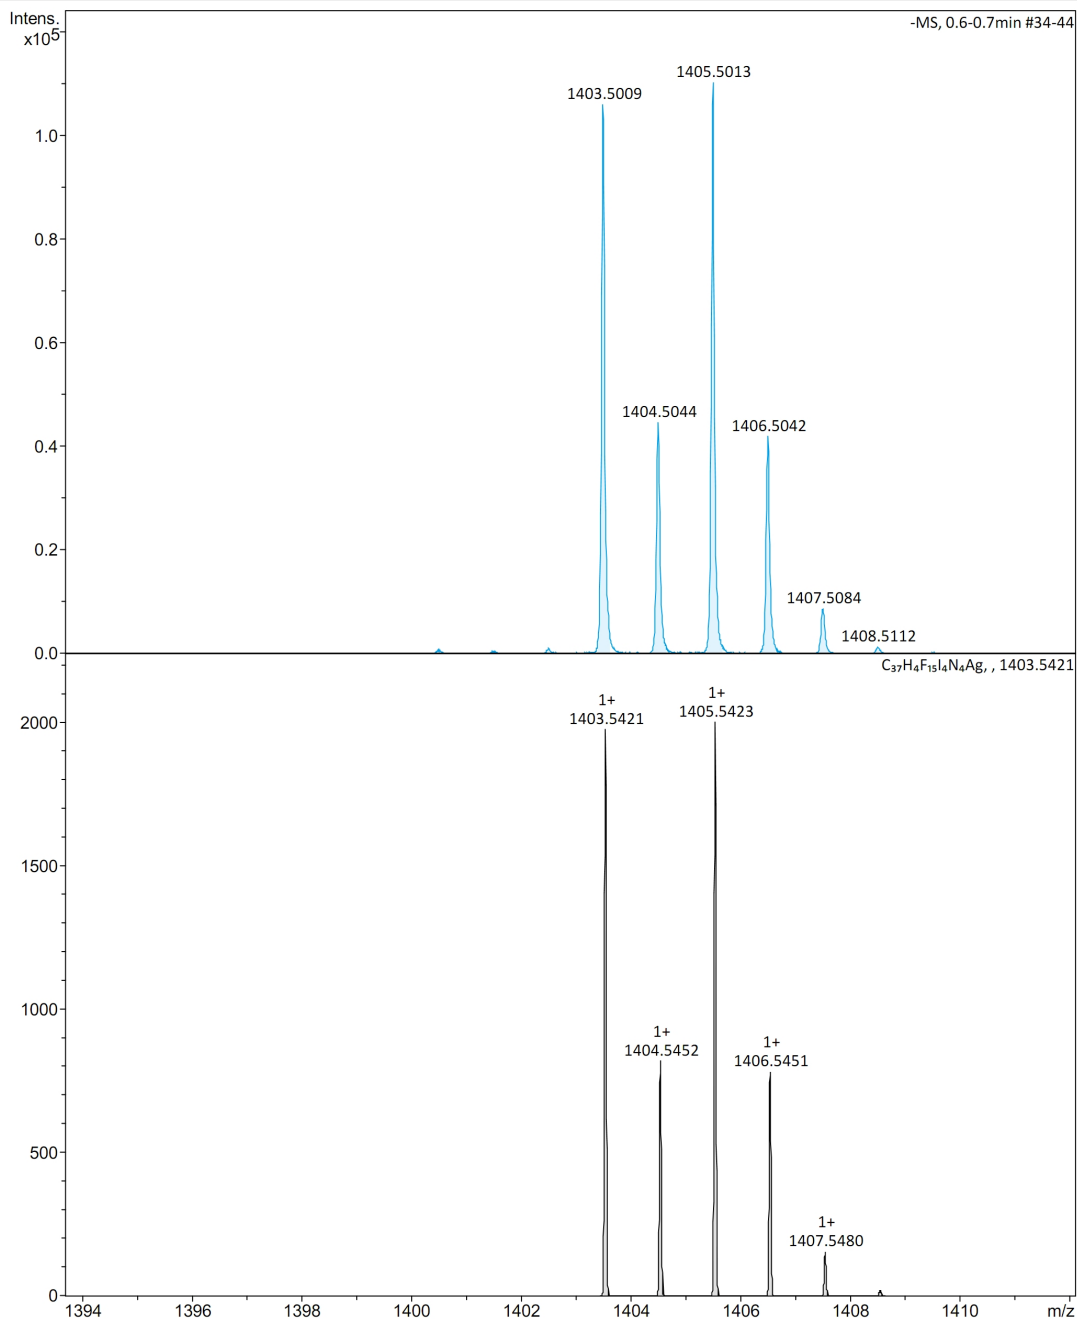

Bruker Compass DataAnalysis 4.2

printed: 9/13/2016 9:45:53 AM

by: Larisa Panz

Page 1 of 1

**Fig. S10:** High-resolution APCI Mass spectrum of (**I<sub>4</sub>-tpfc**)Ag with calculated mass 1403.5421.

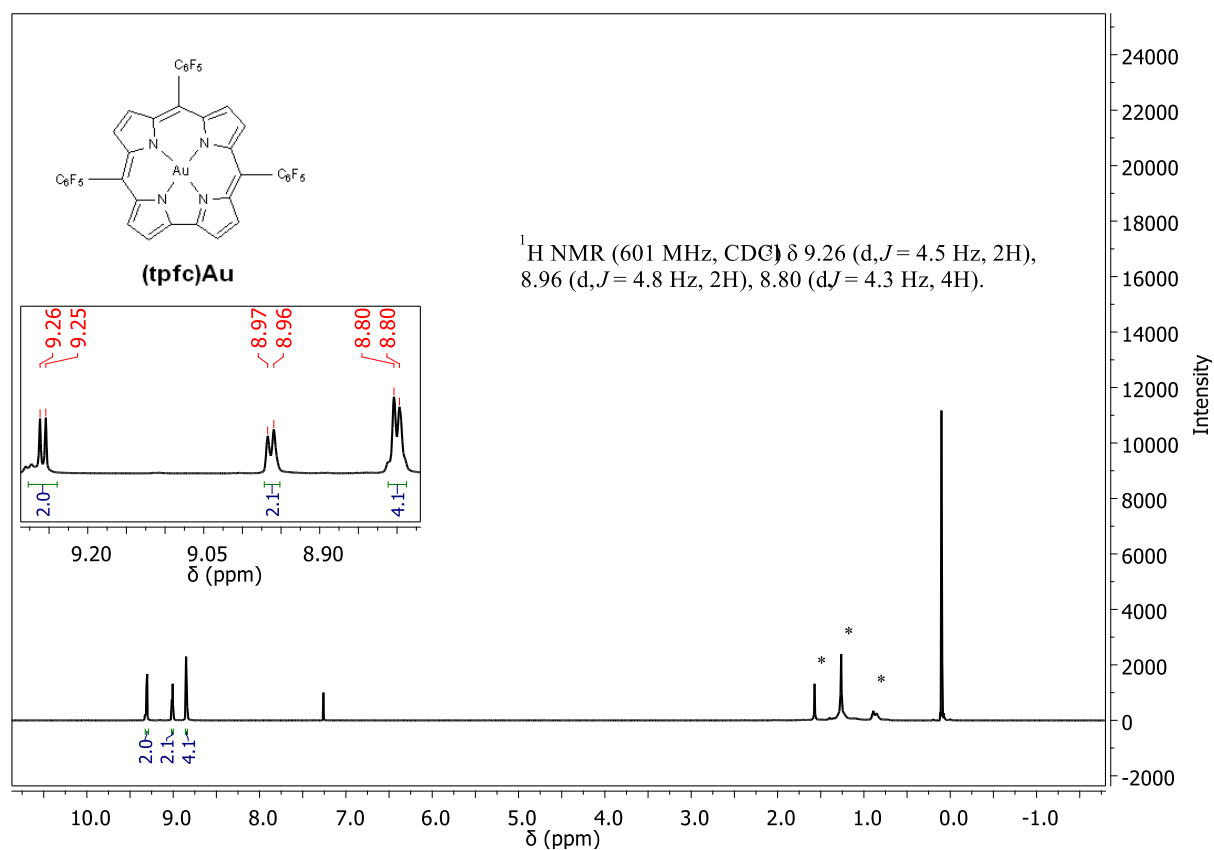

**Fig. S11:**  $^1\text{H}$  NMR spectrum of **(tpfc)Au** were recorded at 400 MHz in  $\text{CDCl}_3$  solvent and ‘\*’ indicates solvents impurities.

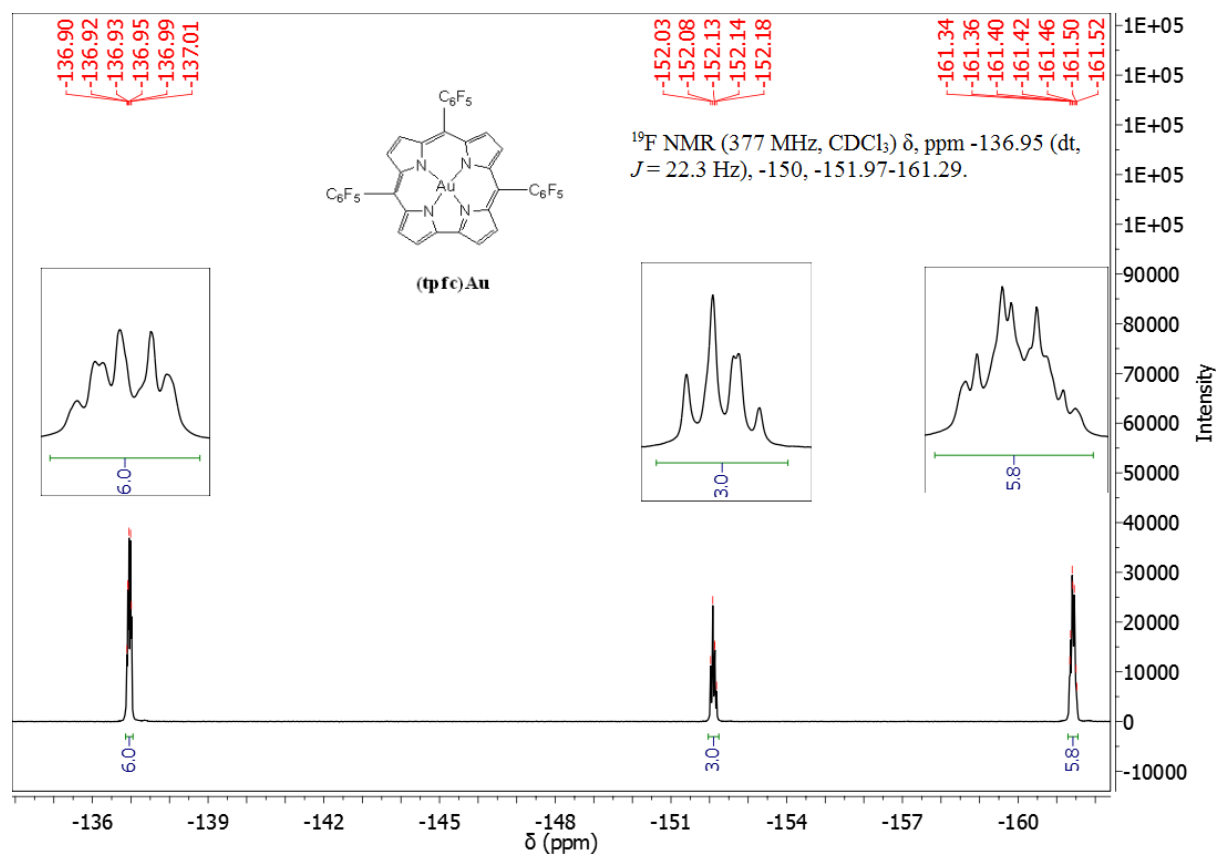

**Fig. S12:**  $^{19}\text{F}$  NMR spectrum of **(tpfc)Au** were recorded at 377 MHz in  $\text{CDCl}_3$  solvent.

## Generic Display Report

### Analysis Info

Analysis Name D:\Data\Gross\Gr\_3830n000001.d  
Method APCI\_pos\_SolidProbe.m  
Sample Name TPFC)Au  
Comment

Acquisition Date 9/12/2016 2:11:57 PM

Operator Larisa Panz  
Instrument maXis impact

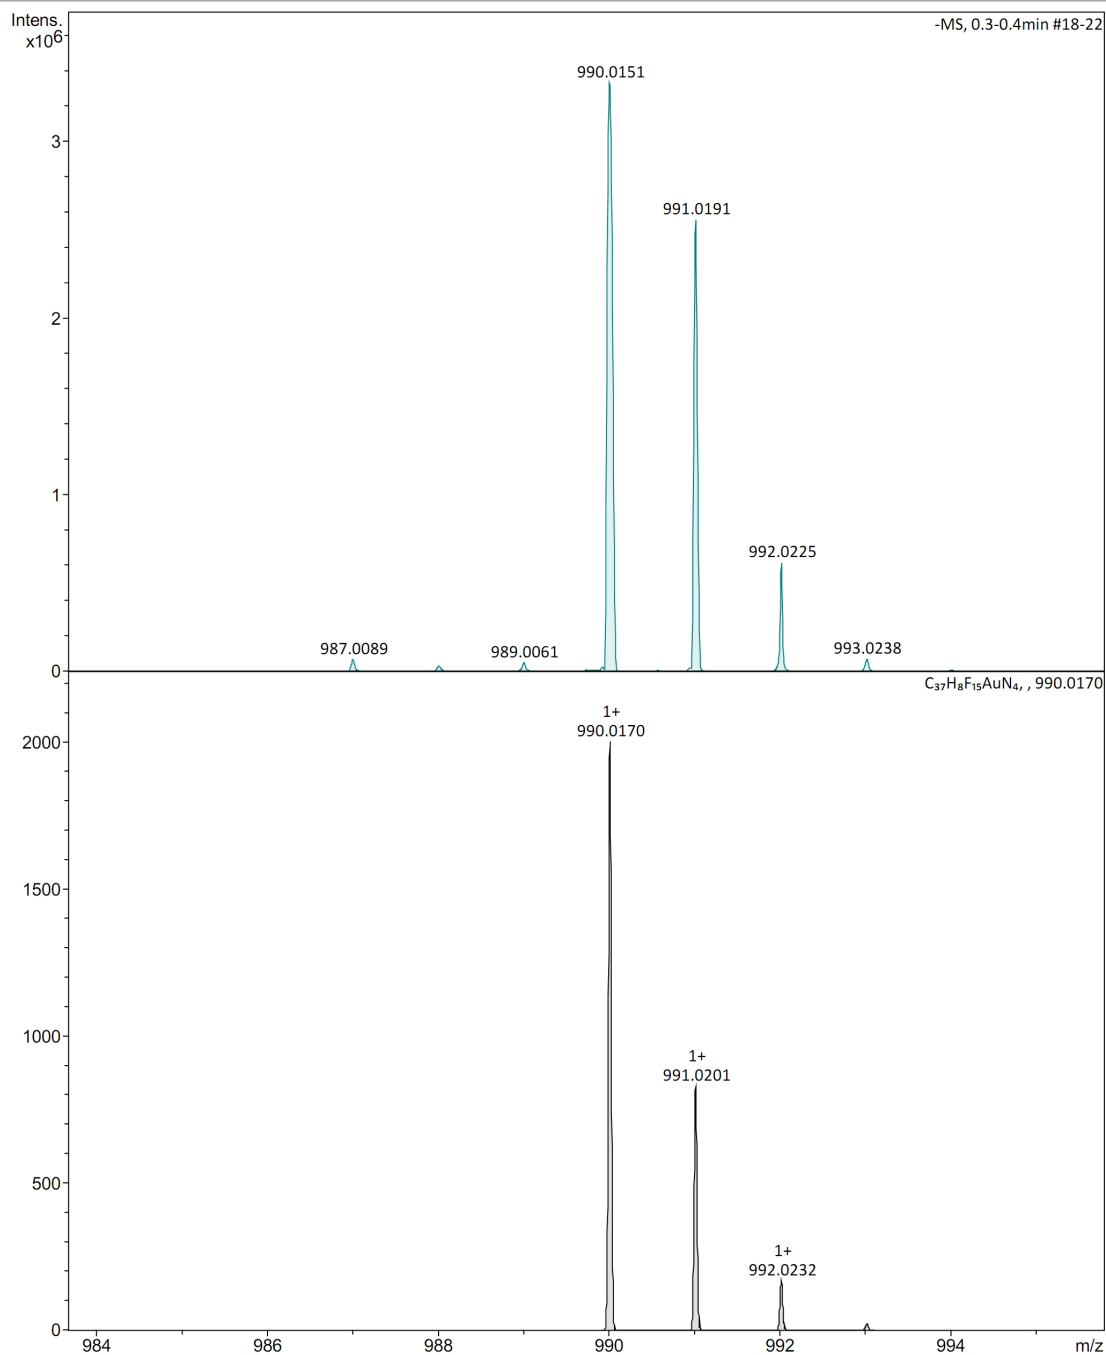

**Fig. S13:** High-resolution APCI mass spectrum of (tpfc)Au with molecular weight 990.0170

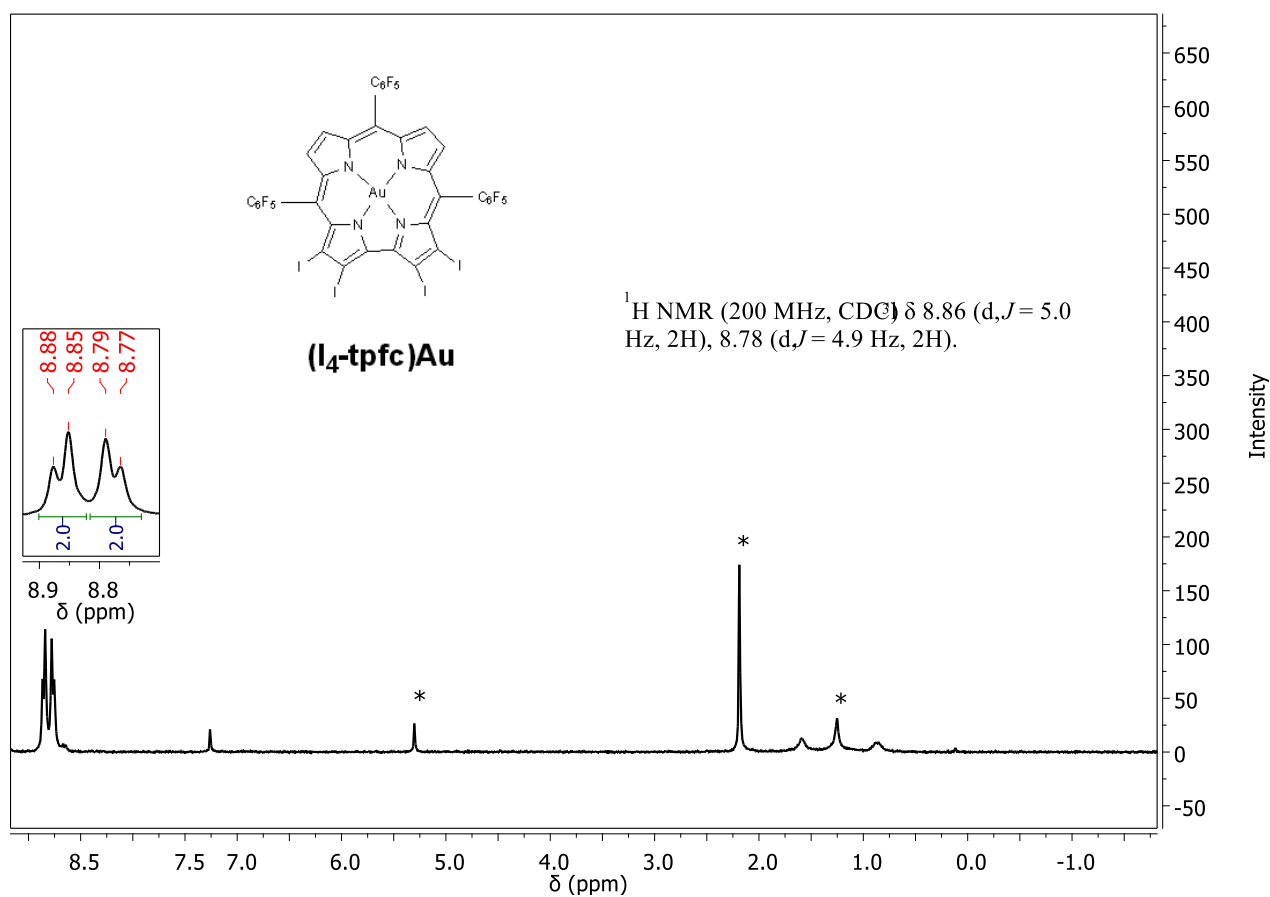

**Fig. S14:**  $^1\text{H}$  NMR spectrum of  $(\text{I}_4\text{-tpfc})\text{Au}$  were recorded at 400 MHz in  $\text{CDCl}_3$  solvent.

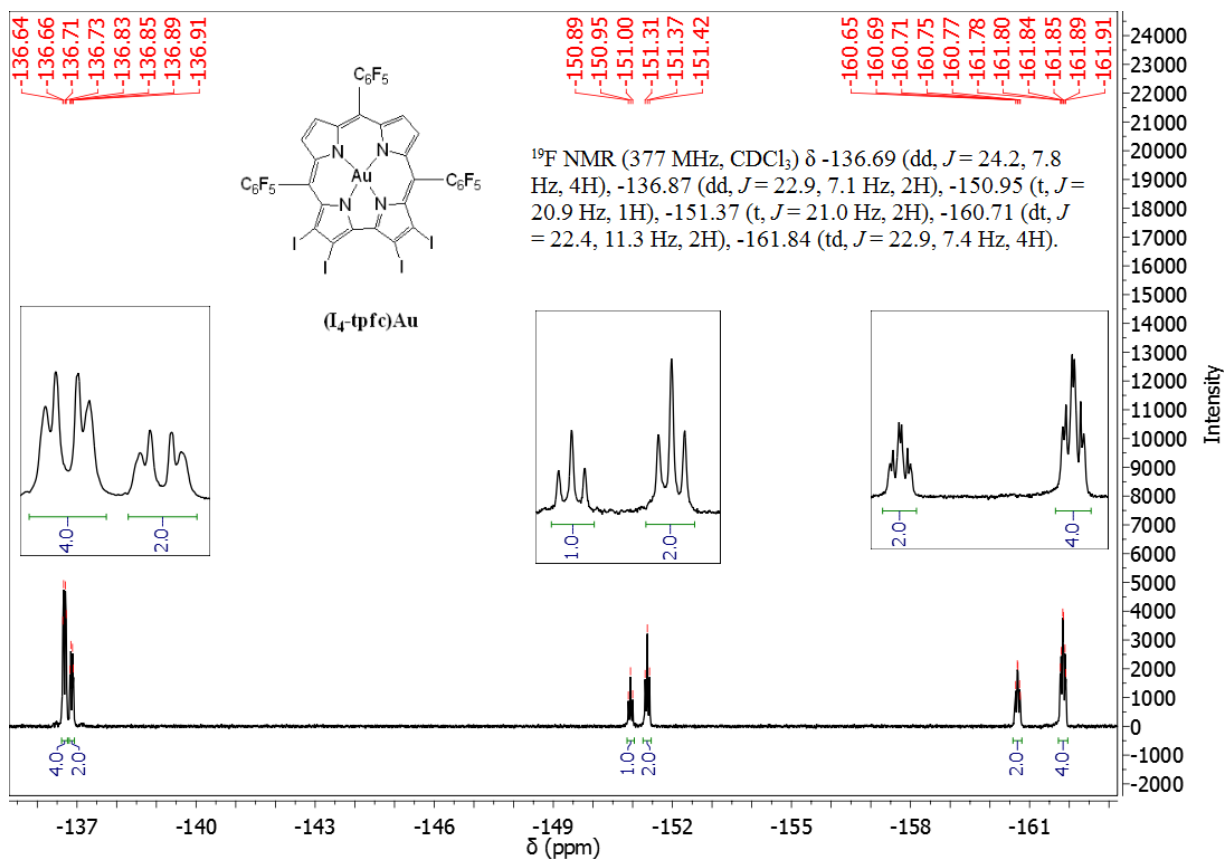

**Fig. S15:**  $^{19}\text{F}$  NMR spectrum of  $(\text{I}_4\text{-tpfc})\text{Au}$  were recorded at 377 MHz in  $\text{CDCl}_3$  solvent.

# Compound Spectrum SmartFormula Report

## Analysis Info

Analysis Name D:\Data\Gross\Gr\_3831n000004.d  
Method APCI\_pos\_SolidProbe.m  
Sample Name (I4-TPFC)Au  
Comment

Acquisition Date 9/12/2016 2:00:51 PM

Operator Larisa Panz  
Instrument maXis impact 282001.00128

## Acquisition Parameter

|             |          |                      |          |                  |           |
|-------------|----------|----------------------|----------|------------------|-----------|
| Source Type | APCI     | Ion Polarity         | Negative | Set Nebulizer    | 1.2 Bar   |
| Focus       | Active   | Set Capillary        | 4000 V   | Set Dry Heater   | 120 °C    |
| Scan Begin  | 50 m/z   | Set End Plate Offset | -500 V   | Set Dry Gas      | 1.5 l/min |
| Scan End    | 2500 m/z | Set Charging Voltage | 2000 V   | Set Divert Valve | Source    |
|             |          | Set Corona           | 2000 nA  | Set APCI Heater  | 300 °C    |

## -MS, 0.4-0.6min #24-33

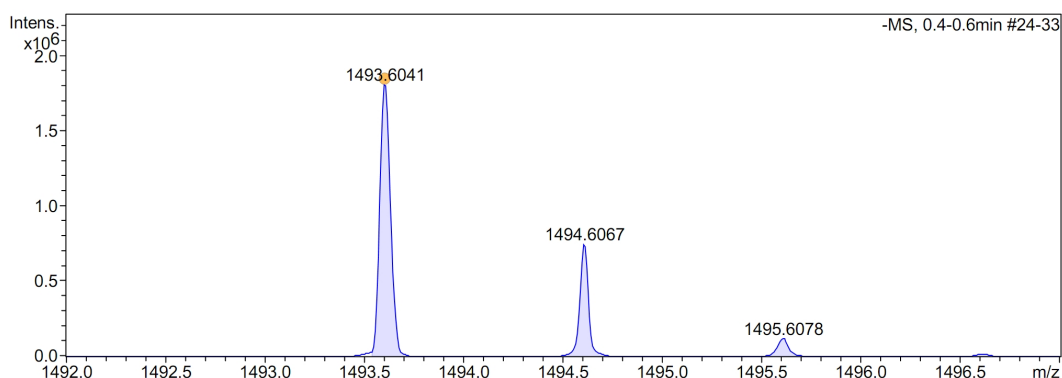

| Meas. m/z | # | Ion Formula      | m/z       | err [ppm] | mSigma | # | mSigma | Score | rdb  | e <sup>-</sup> | Conf | N-Rule | err  [mDa] |
|-----------|---|------------------|-----------|-----------|--------|---|--------|-------|------|----------------|------|--------|------------|
| 1493.6041 | 1 | C37H3AuF15I4N4   | 1492.5963 | -3.2      | 601.8  | 1 | 100.00 | 28.5  | even |                | ok   |        | 4.7        |
|           | 2 | C37H5AuF15I4N4   | 1494.6119 | 1345.5    | 888.6  | 2 | 0.00   | 27.5  | even |                | ok   |        | 2010.9     |
|           | 3 | C36H5AuF15I4N4O  | 1498.6068 | 4007.6    | 890.9  | 3 | 0.00   | 26.5  | even |                | ok   |        | 6005.9     |
|           | 4 | C36H3AuF15I4N4O  | 1496.5912 | 2666.2    | 891.0  | 4 | 0.00   | 27.5  | even |                | ok   |        | 3990.2     |
|           | 5 | C35H3AuF15I4N4O2 | 1500.5861 | 5321.3    | 893.3  | 5 | 0.00   | 26.5  | even |                | ok   |        | 7985.1     |
|           | 6 | C35H5AuF15I4N4O  | 1486.6068 | -4032.1   | 894.1  | 6 | 0.00   | 25.5  | even |                | ok   |        | 5994.2     |
|           | 1 | C37H3AuF15I4N4   | 1492.5963 | -3.2      | 601.8  | 1 | 100.00 | 28.5  | even |                | ok   |        | 4.7        |
|           | 2 | C37H5AuF15I4N4   | 1494.6119 | 1345.5    | 888.6  | 2 | 0.00   | 27.5  | even |                | ok   |        | 2010.9     |
|           | 3 | C36H5AuF15I4N4O  | 1498.6068 | 4007.6    | 890.9  | 3 | 0.00   | 26.5  | even |                | ok   |        | 6005.9     |
|           | 4 | C36H3AuF15I4N4O  | 1496.5912 | 2666.2    | 891.0  | 4 | 0.00   | 27.5  | even |                | ok   |        | 3990.2     |
|           | 5 | C35H3AuF15I4N4O2 | 1500.5861 | 5321.3    | 893.3  | 5 | 0.00   | 26.5  | even |                | ok   |        | 7985.1     |
|           | 6 | C35H5AuF15I4N4O  | 1486.6068 | -4032.1   | 894.1  | 6 | 0.00   | 25.5  | even |                | ok   |        | 5994.2     |

Gr\_3831n000004.d

Bruker Compass DataAnalysis 4.2

printed: 9/12/2016 2:09:14 PM

by: Larisa Panz

Page 1 of 1

**Fig. S16:** High-resolution APCI mass spectrum of (I4-tpfc)Au with calculated mass 1493.6041

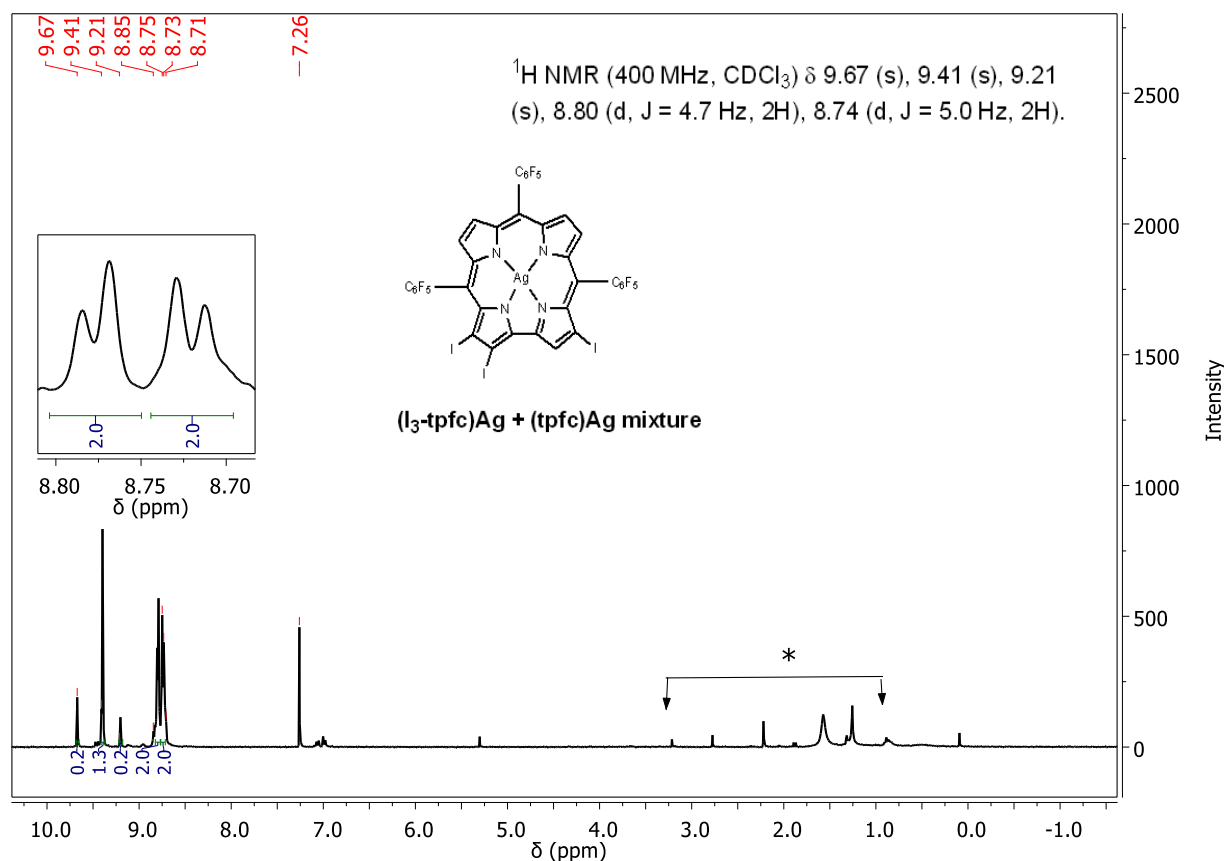

**Fig. S17:**  $^1\text{H}$  NMR spectrum of **(I<sub>3</sub>-tpfc)Ag** (contaminated by unreacted **(tpfc)Ag**) were recorded at 400 MHz in  $\text{CDCl}_3$  solvent.

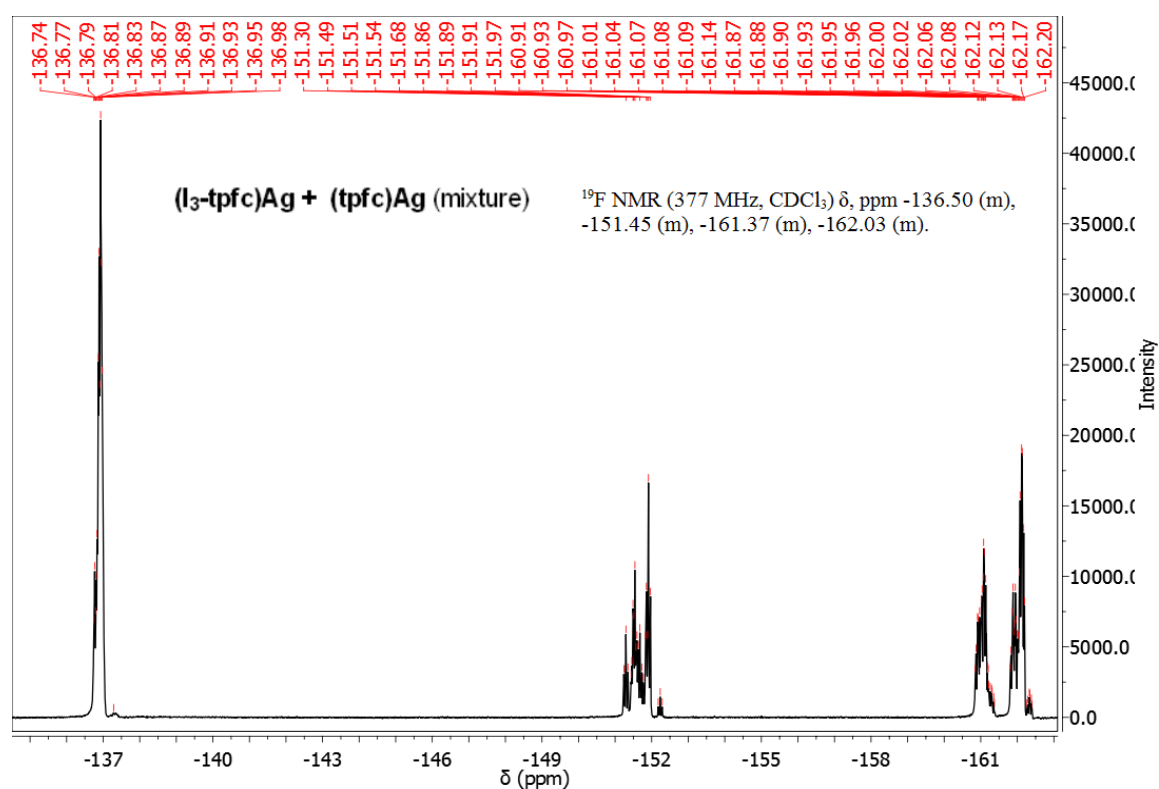

**Fig. S18:**  $^{19}\text{F}$  NMR spectrum of **(I<sub>3</sub>-tpfc)Ag** (contaminated with unreacted **(tpfc)Ag**) were recorded at 377 MHz in  $\text{CDCl}_3$  solvent.



## Display Report

### Analysis Info

Analysis Name D:\Data\Gross\Gr\_3052n000003.d  
Method APCI\_neg\_SolidProbe.m  
Sample Name Ag-TPFCI-m  
Comment

Acquisition Date 3/31/2016 6:50:38 AM

Operator Larisa Panz  
Instrument maXis impact 282001.00128

### Acquisition Parameter

|             |          |                      |          |                  |           |
|-------------|----------|----------------------|----------|------------------|-----------|
| Source Type | APCI     | Ion Polarity         | Negative | Set Nebulizer    | 1.2 Bar   |
| Focus       | Active   | Set Capillary        | 4000 V   | Set Dry Heater   | 120 °C    |
| Scan Begin  | 50 m/z   | Set End Plate Offset | -500 V   | Set Dry Gas      | 1.5 l/min |
| Scan End    | 2500 m/z | Set Charging Voltage | 2000 V   | Set Divert Valve | Source    |
|             |          | Set Corona           | 2000 nA  | Set APCI Heater  | 200 °C    |

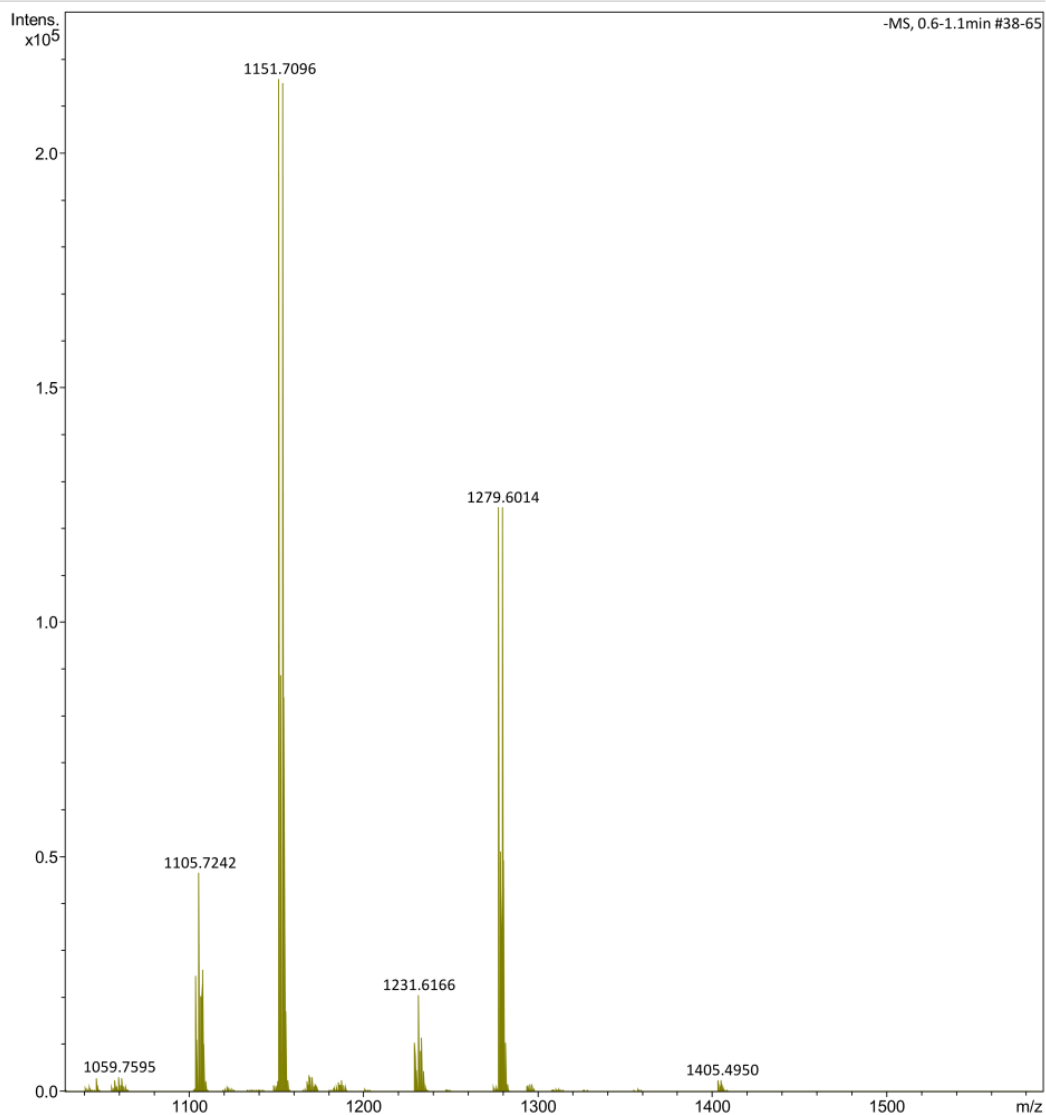

Gr\_3052n000003.d

Bruker Compass DataAnalysis 4.2

printed: 3/31/2016 6:52:27 AM

by: Larisa Panz

Page 1 of 1

**Fig. S19:** APCI mass spectrum of **(I<sub>3</sub>-tpfc)Ag** (contaminated with unreacted **(tpfc)Ag**) molecular weight 1277.6459

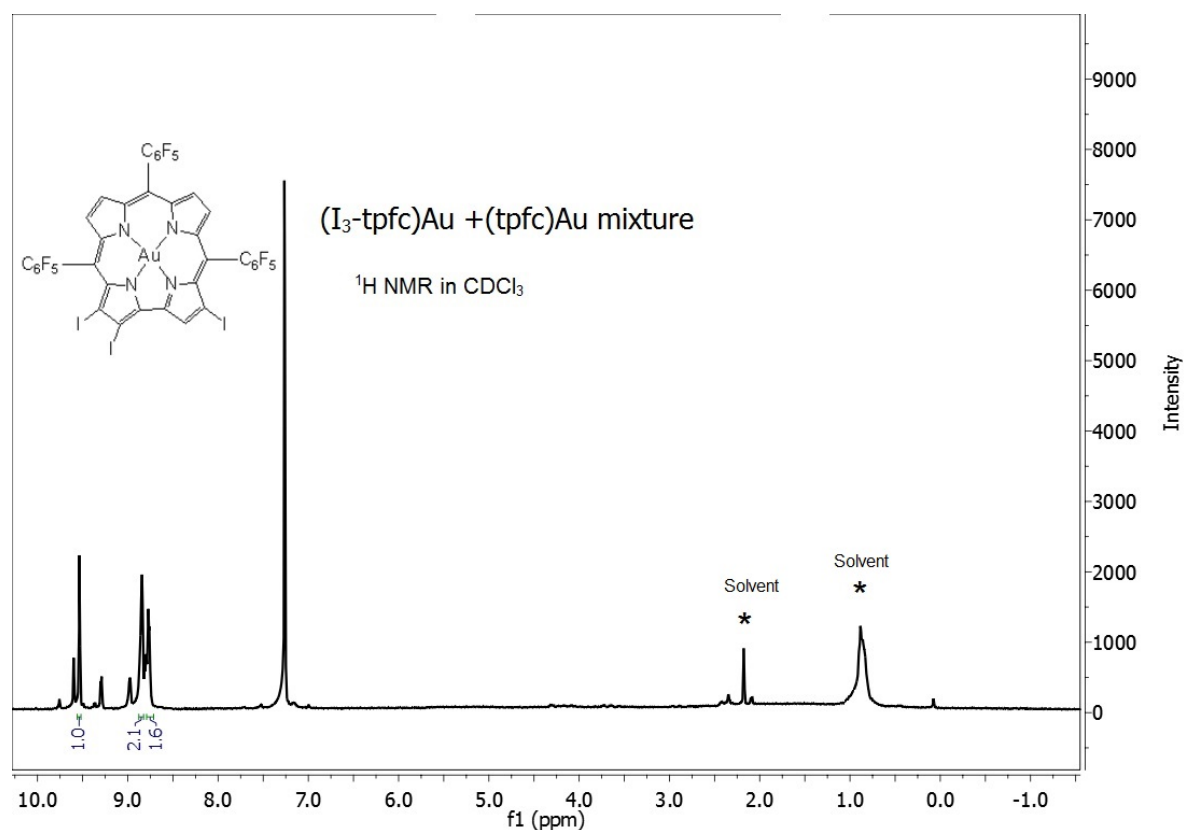

**Fig. S20:** <sup>1</sup>H NMR spectrum of (I<sub>3</sub>-tpfc)Au (contaminated with unreacted (tpfc)Au) were recorded at 400 MHz in CDCl<sub>3</sub> solvent.

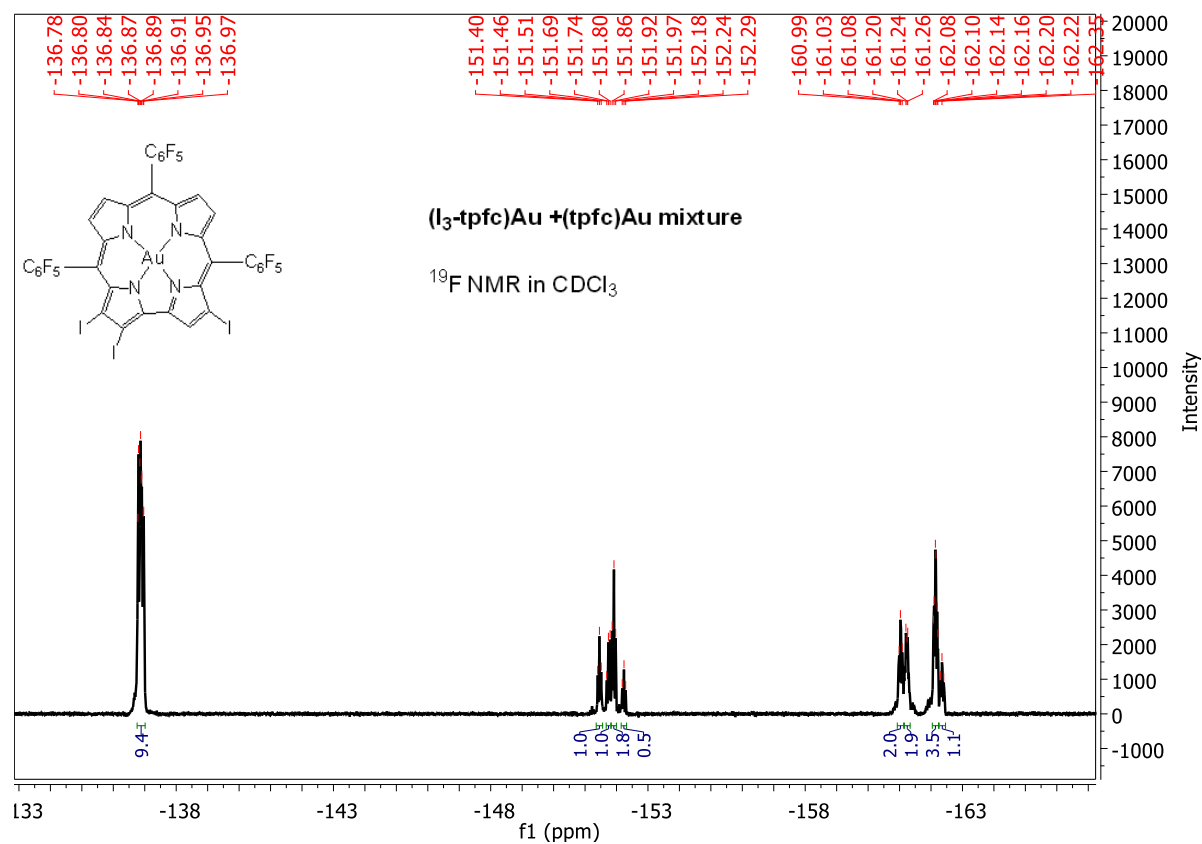

**Fig. S21:** <sup>19</sup>F NMR spectrum of (I<sub>3</sub>-tpfc)Au (contaminated with unreacted (tpfc)Au) were recorded at 377 MHz in CDCl<sub>3</sub> solvent.

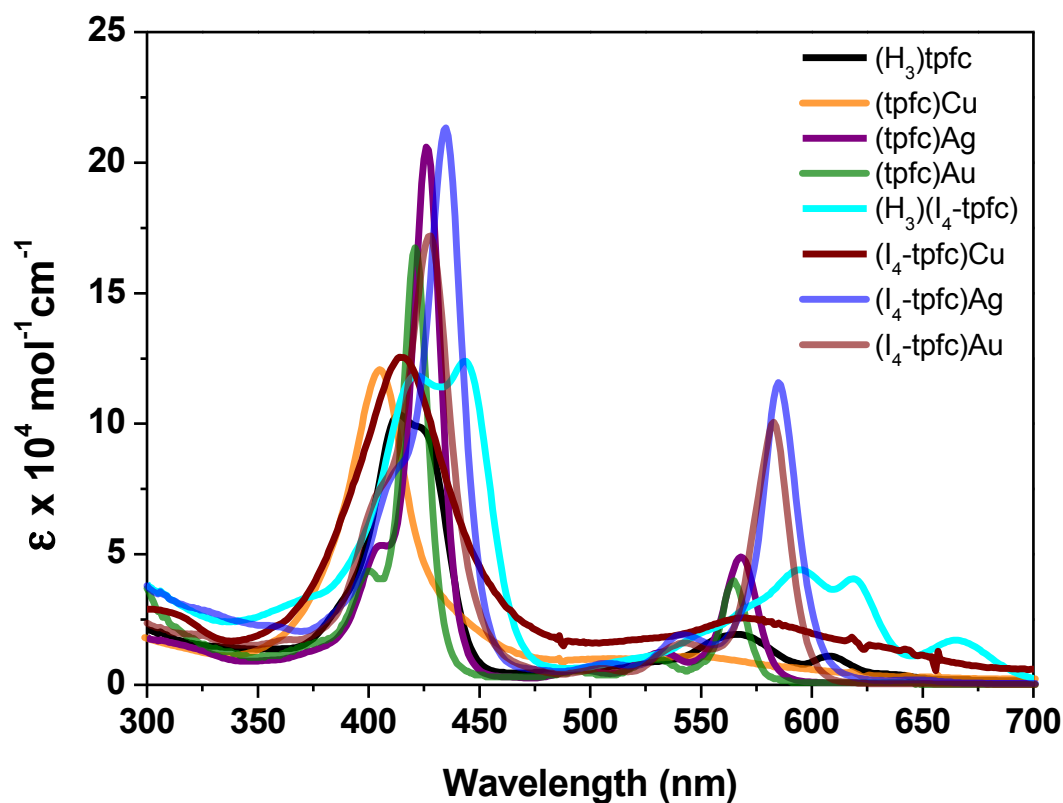

**Fig. S22:** Absorption spectra, in toluene at RT, of  $(H_3)tpfc$ ,  $(tpfc)Cu$ ,  $(tpfc)Ag$ ,  $(tpfc)Au$ ,  $(H_3)(I_4-tpfc)$ ,  $(I_4-tpfc)Cu$ ,  $(I_4-tpfc)Ag$ , and  $(I_4-tpfc)Au$

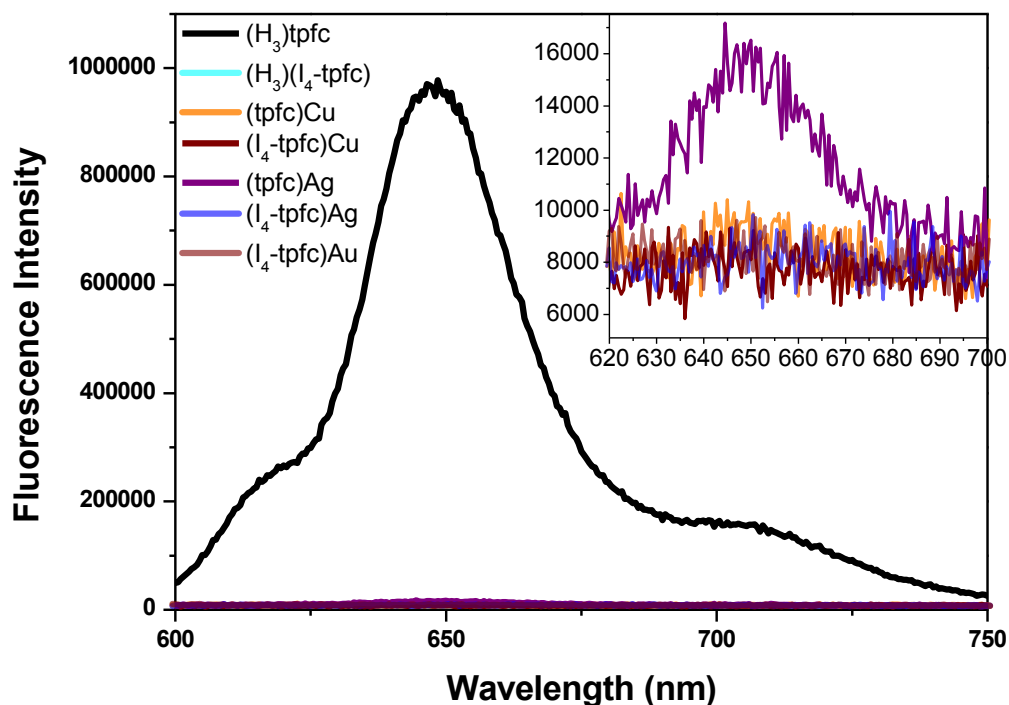

**Fig. S23:** Emission spectra, in toluene at RT and with  $\lambda_{ex} = 405$  nm, of  $(H_3)tpfc$ ,  $(tpfc)Cu$ ,  $(tpfc)Ag$ ,  $(H_3)(I_4-tpfc)$ ,  $(I_4-tpfc)Cu$ ,  $(I_4-tpfc)Ag$ ,  $(I_4-tpfc)Au$ . Inset graph in between range of 620 to 700 nm for clarity.

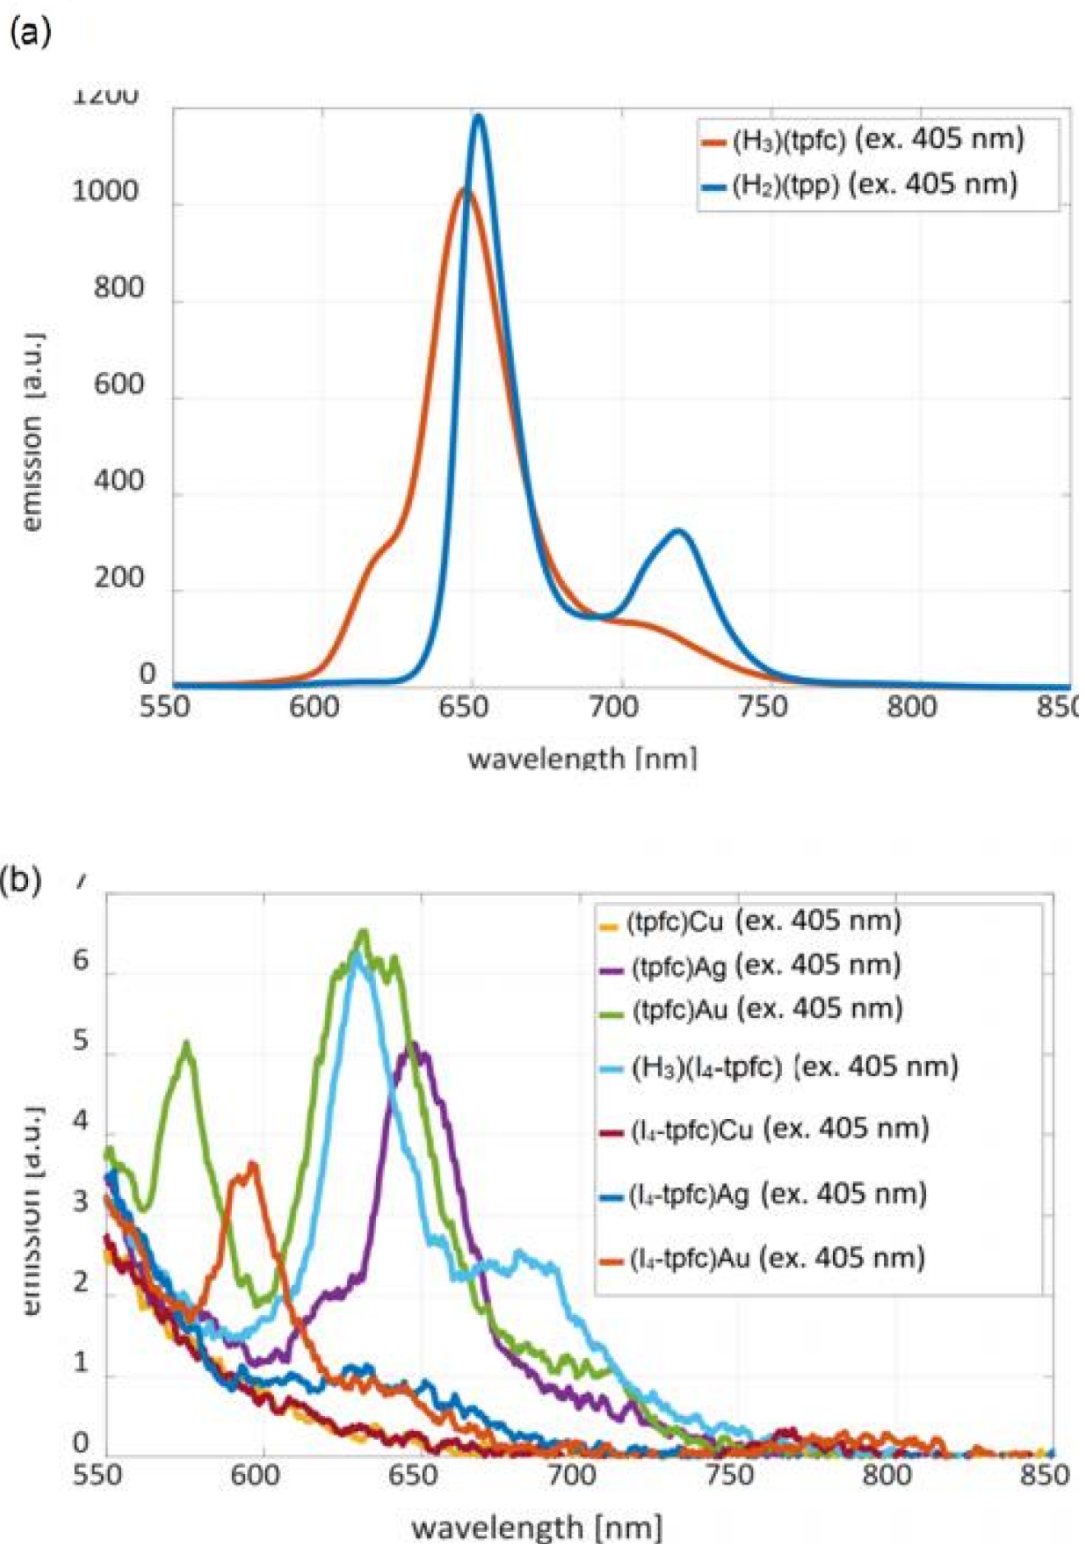

**Fig. S24:** (a) Full emission spectra of  $(H_2)tpc$ ,  $(H_3)tpfc$ , upon excitation at 405 nm of toluene solutions with identical optical density. (b) Emission spectra of the  $(tpfc)M$  and  $(l_4-tpfc)M$  complexes, with  $M = Cu, Ag$ , and  $Au$ .

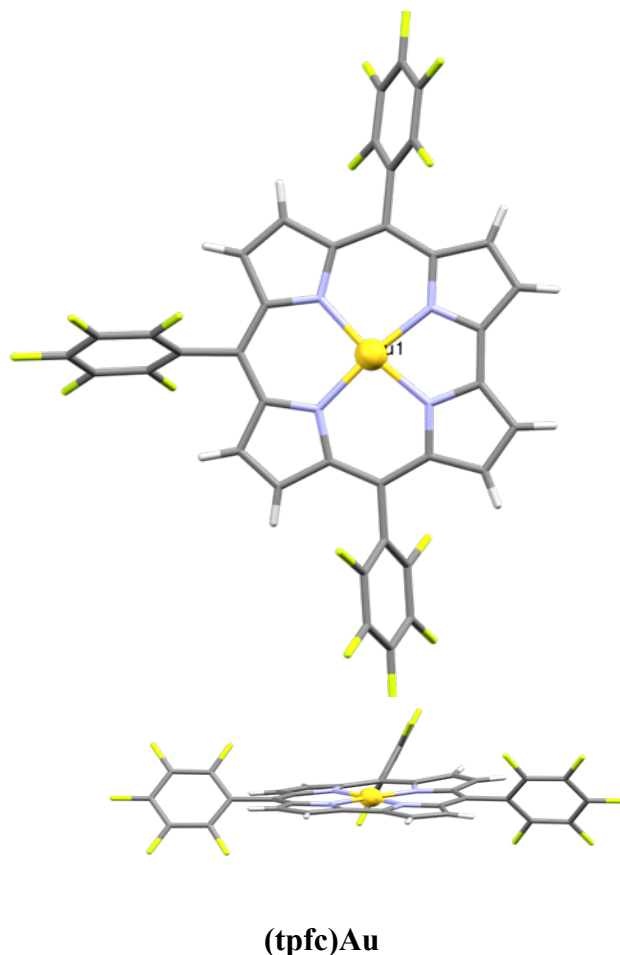

**Fig. S25:** Crystal structures of (tpfc)Au.

**Table S1:** X-ray crystallography data of (tpfc)Au, (I<sub>4</sub>-tpfc)Cu, (I<sub>4</sub>-tpfc)Ag, (I<sub>4</sub>-tpfc)Au.

| entry                                     | (tpfc)Au                                                                                    | (I <sub>4</sub> -tpfc)Cu                                                                                         | (I <sub>4</sub> -tpfc)Ag                                                                                         | (I <sub>4</sub> -tpfc)Au                                                                                                        |
|-------------------------------------------|---------------------------------------------------------------------------------------------|------------------------------------------------------------------------------------------------------------------|------------------------------------------------------------------------------------------------------------------|---------------------------------------------------------------------------------------------------------------------------------|
| Empirical formula                         | 3(C <sub>37</sub> H <sub>8</sub> Au F <sub>15</sub> N <sub>4</sub> ), 2(CHCl <sub>3</sub> ) | C <sub>37</sub> H <sub>4</sub> CuF <sub>15</sub> I <sub>4</sub> N <sub>4</sub> , CH <sub>2</sub> Cl <sub>2</sub> | C <sub>37</sub> H <sub>4</sub> AgF <sub>15</sub> I <sub>4</sub> N <sub>4</sub> , CH <sub>2</sub> Cl <sub>2</sub> | C <sub>37</sub> H <sub>4</sub> AuF <sub>15</sub> I <sub>4</sub> N <sub>4</sub> , C <sub>6</sub> H <sub>6</sub> , C <sub>6</sub> |
| Formula mass                              | 3210.07                                                                                     | 1445.51                                                                                                          | 1489.84                                                                                                          | 1644.18                                                                                                                         |
| Dimensions [mm]                           | 0.30 x 0.24 x 0.12                                                                          | 0.33 x 0.21 x 0.15                                                                                               | 0.15 x 0.12 x 0.03                                                                                               | 0.12 x 0.09 x 0.06                                                                                                              |
| Crystal system                            | tetragonal                                                                                  | monoclinic                                                                                                       | monoclinic                                                                                                       | monoclinic                                                                                                                      |
| a [Å]                                     | 21.092 (2)                                                                                  | 20.0190 (4)                                                                                                      | 19.9970 (4)                                                                                                      | 7.33 (2)                                                                                                                        |
| b [Å]                                     | 21.092 (2)                                                                                  | 13.8650 (3)                                                                                                      | 13.8870 (4)                                                                                                      | 22.65 (5)                                                                                                                       |
| c [Å]                                     | 45.876 (3)                                                                                  | 15.7270 (6)                                                                                                      | 15.3230 (6)                                                                                                      | 28.20 (11)                                                                                                                      |
| V [Å <sup>3</sup> ]                       | 20409(3)                                                                                    | 4061.5 (2)                                                                                                       | 4038.4 (2)                                                                                                       | 4581 (24)                                                                                                                       |
| Space group                               | I 41/a                                                                                      | P 21/c                                                                                                           | P 21/c                                                                                                           | P 21/c                                                                                                                          |
| Z                                         | 8                                                                                           | 4                                                                                                                | 4                                                                                                                | 4                                                                                                                               |
| M(Mo-K <sub>α</sub> ) [mm <sup>-1</sup> ] | 0.6081                                                                                      | 0.5983                                                                                                           | 0.8946                                                                                                           | 0.7143                                                                                                                          |
| R <sub>1</sub>                            | 0.0296                                                                                      | 0.0485                                                                                                           | 0.0789                                                                                                           | 0.0752                                                                                                                          |
| Reflections measured                      | 7584                                                                                        | 5954                                                                                                             | 5994                                                                                                             | 6946                                                                                                                            |
| 2θ <sub>max</sub> [°]                     | 48                                                                                          | 48                                                                                                               | 48                                                                                                               | 48                                                                                                                              |
| Temperature (K)                           | 200 (2)                                                                                     | 200 (2)                                                                                                          | 200 (2)                                                                                                          | 200 (2)                                                                                                                         |

**Table S2:** Absorption data of all the compounds.

| Compound                                   | Absorption,                                                                                          |             |            |             |            |
|--------------------------------------------|------------------------------------------------------------------------------------------------------|-------------|------------|-------------|------------|
|                                            | $\lambda_{\text{max}}$ , nm (log $\epsilon$ , x $10^4 \text{ M}^{-1} \text{ cm}^{-1}$ ) <sup>a</sup> |             |            |             |            |
| <b>(H<sub>3</sub>)tpfc</b>                 |                                                                                                      | 413 (10.3)  | 566 (1.93) | 607 (1.09)  |            |
| <b>(tpfc)Cu</b>                            |                                                                                                      | 404 (12.11) | 545 (1.09) |             |            |
| <b>(tpfc)Ag</b>                            | 406 (5.34)                                                                                           | 426 (20.58) | 532 (1.25) | 568 (4.89)  |            |
| <b>(tpfc)Au</b>                            | 400 (4.34)                                                                                           | 421 (16.72) | 530 (0.95) | 564 (3.98)  |            |
| <b>(H<sub>3</sub>)(I<sub>4</sub>-tpfc)</b> | 421 (11.84)                                                                                          | 443 (12.40) | 594 (4.41) | 618 (4.06)  | 665 (1.70) |
| <b>(I<sub>4</sub>-tpfc)Cu</b>              |                                                                                                      | 414(14.11)  | 569 (2.57) |             |            |
| <b>(I<sub>4</sub>-tpfc)Ag</b>              |                                                                                                      | 434 (21.32) | 542 (1.90) | 585 (11.56) |            |
| <b>(I<sub>4</sub>-tpfc)Au</b>              |                                                                                                      | 427 (17.20) | 542 (1.59) | 583 (10.04) |            |

<sup>a</sup>Solvent: Toluene, Error limits:  $\lambda_{\text{max}}$ ,  $\pm 1$  nm, log  $\epsilon$ ,  $\pm 10\%$ .
